# Supplementary material
Source: PubMed Central journal article supplement (PMC2654244)
Supplement: NIHMS91134-supplement-4_si_004.pdf [file NIHMS91134-supplement-4_si_004.pdf]

# Supporting Information

## Targeting Large Kinase Active Site with Rigid, Bulky Octahedral Ruthenium Complexes

Jasna Maksimoska, Li Feng, Klaus Harms, Chunling Yi, Joseph Kissil, Ronen Marmorstein, and Eric Meggers

*Philipps-Universität Marburg (Marburg, Germany), University of Pennsylvania (Philadelphia, USA), and The Wistar Institute (Philadelphia, USA)*

### Content:

#### A.) Development of Ruthenium PAK-1 inhibitors

- A.1.) Initial screening of an organometallic library for PAK1 inhibition
- A.2.) Synthesis of the octahedral ruthenium compounds **FL172** and **FL411**
- A.3.) Identification of **FL172** from an initial library of octahedral ruthenium complexes
- A.4.) Identification of **FL411** from a library of **FL172** derivatives
- A.5.) Crystallographic data of **FL389** for the determination of the relative configurations of **FL172** and **FL411**
- A.6.) Resolution of racemic mixtures and determination of absolute configurations

#### B.) Kinase assays

- B.1.) Kinase assays with the protein kinases PAK1, Pim1, and GSK3
- B.2.) Selectivity of **FL172** in a panel of 264 protein kinases

#### C.) PAK-1 crystallography

- C.1.) PAK1 expression and purification
- C.2.) Crystallization and data collection
- C.3.) Structure determination and refinement

#### D.) Cell-based assays

## A.) Development of Ruthenium PAK-1 Inhibitors

### A.1.) Initial screening of an organometallic library for PAK1 inhibition

A library of 48 organometallic compounds was tested for PAK1 inhibition at the concentration of 10  $\mu\text{M}$  with an ATP concentration of 1  $\mu\text{M}$  (see part B for details of the kinase assay). The results are shown in the bar diagram below (Figure S1) with the corresponding molecular structures of the library members displayed in Figure S2.

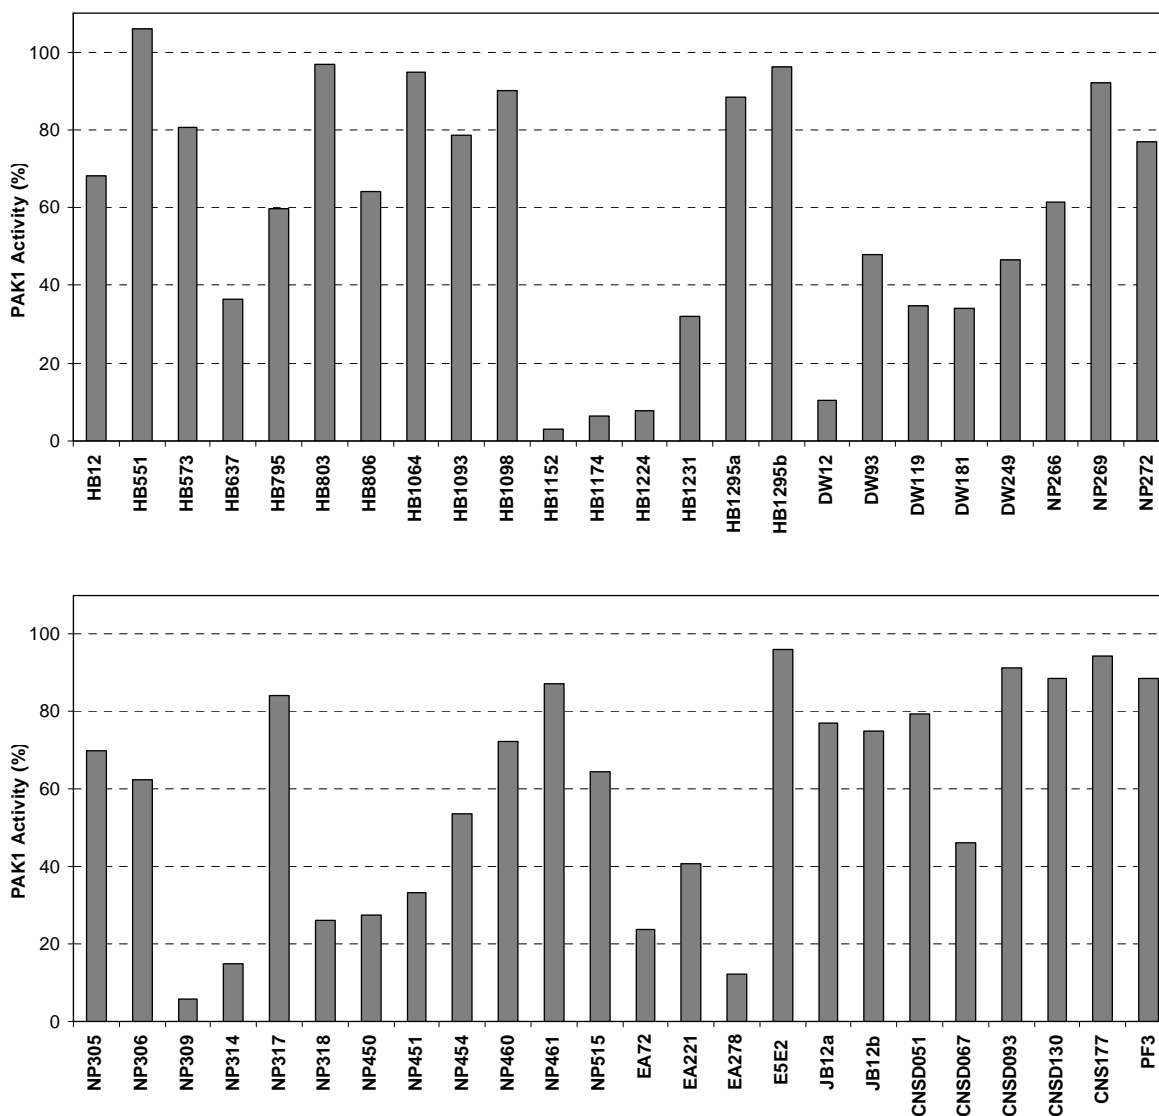

**Figure S1.** Initial screening of a 48-member organometallic library for PAK1 inhibition at a compound concentration of 10  $\mu\text{M}$  and 1  $\mu\text{M}$  ATP. See part B for assay details.

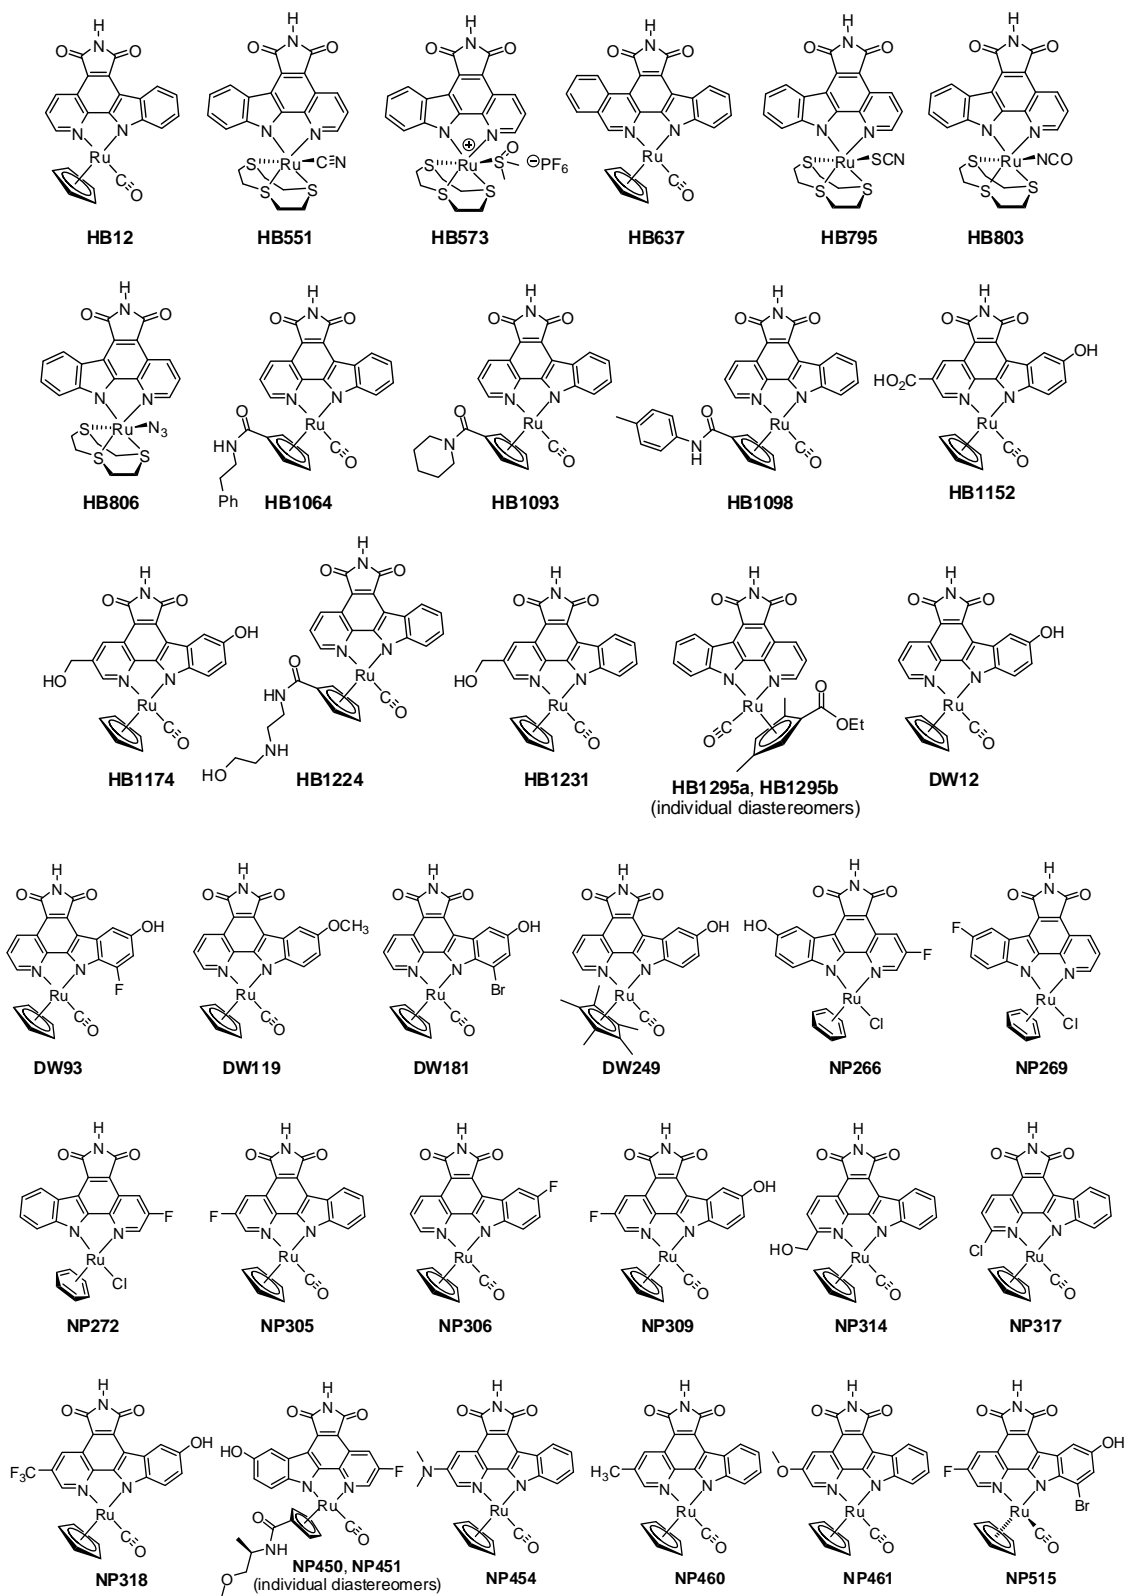

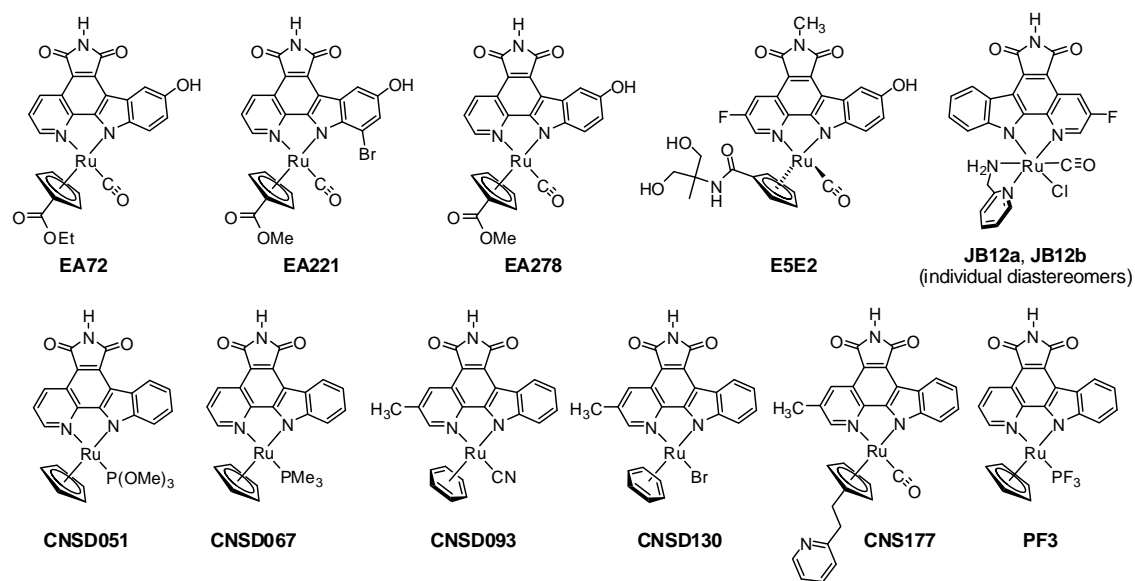

**Figure S2.** Molecular structures of the 48-member organometallic library. Compounds were racemic, except for **E5E2** for which the absolute stereochemistry is indicated. For the synthesis of these compounds, see: Bregman, H.; Williams, D. S.; Meggers, E. *Synthesis* **2005**, 1521-1527; Bregman, H.; Meggers, E. *Org. Lett.* **2006**, *8*, 5465-5468; Atilla, G. E.; Williams, D. S.; Bregman, H.; Pagano, N.; Meggers, E. *ChemBioChem* **2006**, *7*, 1443-1450; Bregman, H.; Carroll, P. J.; Meggers, E. *J. Am. Chem. Soc.* **2006**, *128*, 877-884; Pagano, N.; Maksimoska, J.; Bregman, H.; Williams, D. S.; Webster, R. D.; Xue, F.; Meggers, E. *Org. Biomol. Chem.* **2007**, *5*, 1218-1227. Xie, P.; Williams, D. S., Atilla-Gokcumen, G. E.; Milk, L.; Xiao, M.; Smalley, K. S. M.; Herlyn, M.; Meggers, E.; Marmorstein, R. *ACS Chem. Biol.* **2008**, *3*, 305-316.

## A.2.) Synthesis of the octahedral ruthenium compounds FL172 and FL411

**General Procedures.** NMR spectra were recorded on a Bruker AM-400 (400 MHz) or AV-300 (300 MHz) spectrometer. Low-resolution mass spectra were obtained on an LC platform from Micromass using the ESI technique. High-resolution mass spectra were obtained on a Micromass Autospec instrument using either CI or ES ionization or a Thermo Finnigan LTQ FT instrument using either APCI or ES ionization. Infrared spectra were recorded on a Bruker IFS 88 or Perkin Elmer 1600 series FTIR spectrometer. Photolyses were performed with a medium pressure Hg lamp (150 W). Solvents and reagents were supplied from Aldrich, Acros, or Strem. Reactions were performed under an atmosphere of nitrogen unless otherwise specified. The TBS-protected pyridocarbazole **1** was synthesized as published (Pagano, N.; Maksimoska, J.; Bregman, H.; Williams, D. S.; Richard, D.; Webster, R. D.; Xue, F.; Meggers, E., *Org. Biomol. Chem.* **2007**, 5, 1218-1227). NMR standards used are as follows: ( $^1\text{H}$  NMR)  $\text{CD}_3\text{CN}$ : 1.94 ppm,  $(\text{CD}_3)_2\text{CO}$ : 2.05 ppm,  $\text{DMF-}d_7$ : 8.03, 2.92, 2.75 ppm. ( $^{13}\text{C}$  NMR)  $\text{CDCl}_3$ : 77.23 ppm,  $\text{DMSO-}d_6$ : 39.51 ppm,  $\text{DMF-}d_7$ : 163.15, 34.89, 29.76 ppm.

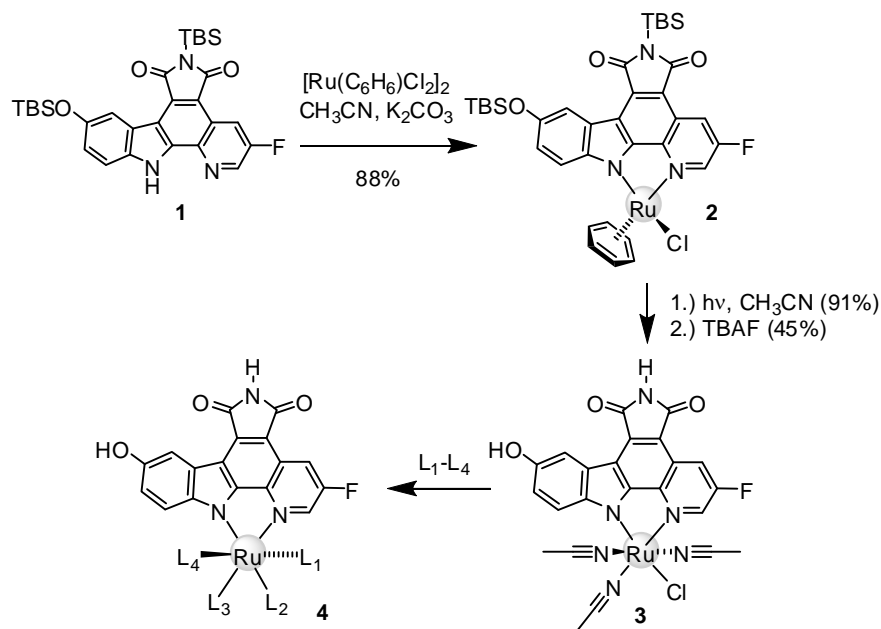

**Figure S3.** Synthesis of octahedral ruthenium complexes.

**Compound 2.** A suspension of the ligand **1** (180 mg, 0.33 mmol), K<sub>2</sub>CO<sub>3</sub> (50 mg, 0.36 mmol), and [RuCl<sub>2</sub>(η<sup>6</sup>-C<sub>6</sub>H<sub>6</sub>)<sub>2</sub>] (123 mg, 0.25 mmol) in CH<sub>3</sub>CN (50 mL) was purged with nitrogen and stirred at 50 °C for 3 h. The resulting dark red suspension was dried in vacuo and the crude material was adsorbed onto silica gel and subjected to silica gel chromatography with dichloromethane : methanol (first 50:1, then 35:1) as the eluting solvent. The half-sandwich complex **2** was isolated as a dark red solid (220 mg, 88%). <sup>1</sup>H NMR (300 MHz, acetonitrile-*d*<sub>3</sub>): δ (ppm) 9.46 (t, *J* = 2.6 Hz, 1H), 8.86 (dd, *J* = 9.4, 2.3 Hz, 1H), 8.25 (d, *J* = 2.5 Hz, 1H), 7.88 (d, *J* = 9.1 Hz, 1H), 7.23 (dd, *J* = 8.8, 2.6 Hz, 1H), 6.08 (s, 6H), 1.07 (s, 9H), 1.01 (s, 9H), 0.55 (s, 6H), 0.30 (s, 6H). <sup>13</sup>C NMR (75.5 MHz, CDCl<sub>3</sub>): δ (ppm) 175.1, 173.9, 157.1 (d, *J*<sub>C-F</sub> = 251.4 Hz), 153.0, 150.2, 146.5, 140.9, 140.4, 140.2, 133.9, 125.0, 121.5 (d, *J*<sub>C-F</sub> = 8.4 Hz), 120.7, 119.9 (d, *J*<sub>C-F</sub> = 19.9 Hz), 115.0, 114.6, 113.9 (d, *J*<sub>C-F</sub> = 4.9 Hz), 83.4, 26.5, 26.0, 19.1, 18.4, -4.0, -4.2. IR (film): ν (cm<sup>-1</sup>) 2955, 2930, 2857, 1746, 1688, 1562, 1462, 1335, 1310, 1296, 1258, 1238, 829. HRMS calculated for C<sub>35</sub>H<sub>41</sub>FN<sub>3</sub>O<sub>3</sub>Si<sub>2</sub>Ru (M-Cl)<sup>+</sup> 728.1708, found (M-Cl)<sup>+</sup> 728.1701.

**Compound 3.** A red solution of **2** (180 mg, 0.24 mmol) in CH<sub>3</sub>CN (220 mL) was purged with nitrogen for 10 min and then irradiated with a mercury medium pressure lamp (pyrex filter) for 3 hours while nitrogen was bubbled through the solution. The resulting dark green solution was dried in vacuo and the crude material was adsorbed onto silica gel and subjected to silica gel chromatography with dichloromethane : methanol (first 75:1, then 35:1). The combined product eluents were isolated as a mixture of two diastereoisomers (175 mg, 91%). To the stirred green solution of the mixture (175 mg, 0.22 mmol) in CH<sub>3</sub>CN was added tetrabutylammonium fluoride (660 μL, 1 M in THF, 0.66 mmol) at 0 °C, and the solution was stirred at 0 °C for 5 min. To the resulting green solution was added glacial acetic acid (38 μL, 0.66 mmol), and it was stirred for 2 min at 0 °C. The solution was dried in vacuo and the crude material was adsorbed onto silica gel and subjected to silica gel chromatography with

dichloromethane : methanol (first 50:1, then 20:1) to yield the precursor complex **3** (57 mg, 45%) and a second diastereoisomer in lower amounts (31 mg, 25%). Analytical data for the main diastereomer **3**:  $^1\text{H}$  NMR (400 MHz,  $\text{DMF-}d_7$ ):  $\delta$  (ppm) 10.88 (s, 1H), 9.53 (t,  $J = 2.9$  Hz, 1H), 9.27 (s, 1H), 8.65 (dd,  $J = 9.5, 2.5$  Hz, 1H), 8.28 (d,  $J = 2.4$  Hz, 1H), 7.81 (d,  $J = 8.7$  Hz, 1H), 7.17 (dd,  $J = 8.7, 2.5$  Hz, 1H), 3.04 (s, 3H), 2.27 (s, 6H).  $^{13}\text{C}$  NMR (100.6 MHz,  $\text{DMF-}d_7$ ):  $\delta$  (ppm) 171.4, 171.1, 157.1 (d,  $J_{\text{C-F}} = 246.0$  Hz), 156.3, 152.2, 148.0, 144.1, 141.2, 140.9, 131.6, 127.4, 125.1, 122.8, 121.1 (d,  $J_{\text{C-F}} = 8.5$  Hz), 116.3 (d,  $J_{\text{C-F}} = 13.6$  Hz), 115.5 (d,  $J_{\text{C-F}} = 20.6$  Hz), 115.1, 110.1 (d,  $J_{\text{C-F}} = 4.6$  Hz), 109.0 (the methyl group peaks were hidden by the solvent peak). IR (film):  $\nu$  ( $\text{cm}^{-1}$ ) 2277, 1721, 1649, 1529, 1497, 1469, 1437, 1384, 1083, 1028, 774. HRMS calculated for  $\text{C}_{23}\text{H}_{16}\text{FN}_6\text{O}_3\text{Ru}$  ( $\text{M} - \text{Cl}$ ) $^+$  545.0306, found ( $\text{M} - \text{Cl}$ ) $^+$  545.0307.

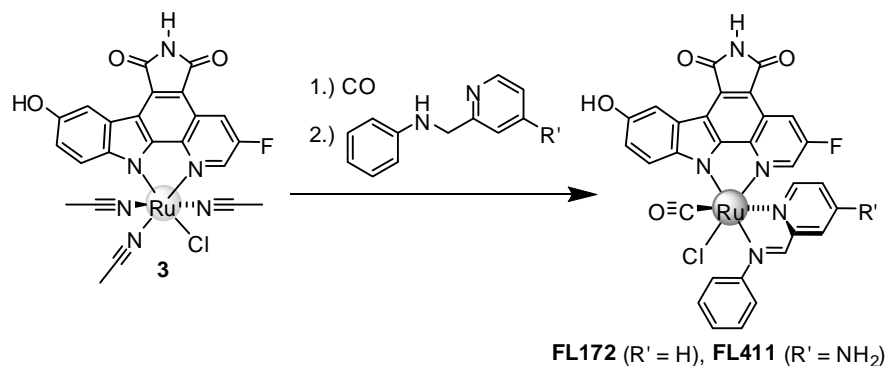

**Figure S4.** Synthesis of **FL172** and **FL411**.

**Complex FL172.** A solution of precursor complex **3** (7 mg, 0.012 mmol) in DMF (2 mL) was purged with CO gas for 5 min, then stirred at 75 °C under the atmosphere of CO for 1 hour. To the resulting solution was added 2-(phenylaminomethyl)pyridine (120  $\mu\text{L}$ , 100 mM in DMF), then the solution was stirred at 95 °C under the atmosphere of nitrogen for 1.5 hours, after which the purple solution was dried under high vacuum. The crude material was adsorbed onto silica gel and subjected to silica gel chromatography with dichloromethane :

methanol (50:1) to yield compound **FL172** as a single diastereomer (3.5 mg, 44%). The relative configuration was initially determined by NOE measurements (data not shown) and later confirmed by a crystal structure of a derivative (see A.2.).  $^1\text{H}$  NMR (300 MHz, acetone- $d_6$ ):  $\delta$  (ppm) 9.89 (s, 1H), 9.22 (s, 1H), 8.69 (dd,  $J = 9.4, 2.4$  Hz, 1H), 8.59 (d,  $J = 8.9$  Hz, 1H), 8.38 (dt,  $J = 7.7, 0.9$  Hz, 1H), 8.36 (t,  $J = 2.6$  Hz, 1H), 8.31 (dd,  $J = 2.5, 0.4$  Hz, 1H), 8.21 (s, 1H), 8.16 (td,  $J = 7.6, 1.9$  Hz, 1H), 8.13 (m, 2H), 7.69 (m, 2H), 7.59 (m, 1H), 7.48 (m, 1H), 7.44 (td,  $J = 5.4, 1.3$  Hz, 1H), 7.15 (dd,  $J = 8.9, 2.6$  Hz, 1H).  $^{13}\text{C}$  NMR (100.6 MHz, DMSO- $d_6$ ):  $\delta$  (ppm) 200.7, 170.4 (d,  $J_{\text{C-F}} = 16.9$  Hz), 169.7, 157.6, 155.1, 154.4, 153.1, 151.8, 147.5 (d,  $J_{\text{C-F}} = 217.4$  Hz), 141.3 (d,  $J_{\text{C-F}} = 33.8$  Hz), 140.5, 139.7, 131.7, 129.5, 129.1 (d,  $J_{\text{C-F}} = 23.9$  Hz), 128.3, 124.3, 122.4, 120.3 (d,  $J_{\text{C-F}} = 8.3$  Hz), 117.9, 117.6 (d,  $J_{\text{C-F}} = 19.6$  Hz), 116.5, 114.4, 111.0, 108.1. IR (film):  $\nu$  ( $\text{cm}^{-1}$ ) 3199, 2919, 1962, 1687, 1650, 1499, 1469, 1428, 1405, 1384, 1335, 1028. HRMS calculated for  $\text{C}_{30}\text{H}_{17}\text{ClFN}_5\text{O}_4\text{RuNa}$  ( $\text{M} + \text{Na}$ ) $^+$  689.9889, found ( $\text{M} + \text{Na}$ ) $^+$  689.9906.

**Complex FL411.** A solution of precursor complex **3** (7 mg, 0.012 mmol) in DMF (2 mL) was purged with CO gas for 5 min, then stirred at 75 °C under the atmosphere of CO for 1 hour. To the resulting solution was added 2-(phenylaminomethyl)-4-aminopyridine (120  $\mu\text{L}$ , 100 mM in DMF), then the solution was stirred at 95 °C under the atmosphere of nitrogen for 3 hours, after which the purple solution was dried under high vacuum. The crude material was adsorbed onto silica gel and subjected to silica gel chromatography with dichloromethane : methanol (35:1) to obtain compound **FL411** (2.5 mg, 30%).  $^1\text{H}$  NMR (300 MHz, acetone- $d_6$ ):  $\delta$  (ppm) 9.86 (s, 1H), 8.90(s, 1H), 8.70 (dd,  $J = 9.4, 2.4$  Hz, 1H), 8.60 (d,  $J = 8.9$  Hz, 1H), 8.32 (t,  $J = 2.6$  Hz, 1H), 8.29 (d,  $J = 2.3$  Hz, 1H), 8.18 (s, 1H), 8.09 (m, 2H), 7.65 (m, 2H), 7.54 (m, 1H), 7.45 (d,  $J = 2.5$  Hz, 1H), 7.14 (dd,  $J = 8.9, 2.6$  Hz, 1H), 6.78 (d,  $J = 6.3$  Hz, 1H), 6.53 (s, 2H), 6.43 (dd,  $J = 6.3, 2.5$  Hz, 1H).  $^{13}\text{C}$  NMR (100.6 MHz, DMSO- $d_6$ ):  $\delta$  (ppm) 200.6, 170.6, 170.4 (d,  $J_{\text{C-F}} = 13.4$  Hz), 157.6, 155.3 (d,  $J_{\text{C-F}} = 211.5$  Hz), 155.1,



153.2 (d,  $J_{C-F} = 5.3$  Hz), 151.7, 147.3, 146.5, 140.6, 140.5 (d,  $J_{C-F} = 33.4$  Hz), 131.7, 129.3, 128.6, 124.1, 122.4, 120.2 (d,  $J_{C-F} = 8.5$  Hz), 118.0, 117.3 (d,  $J_{C-F} = 20.1$  Hz), 116.3, 114.3, 114.2, 110.6 (d,  $J_{C-F} = 4.9$  Hz), 110.4, 108.0. IR (film):  $\nu$  ( $\text{cm}^{-1}$ ) 3312, 3204, 1960, 1715, 1470, 1454, 1385, 1335, 1099, 1024, 403. HRMS calculated for  $\text{C}_{30}\text{H}_{18}\text{ClFN}_6\text{O}_4\text{RuNa}$  ( $\text{M} + \text{Na}$ )<sup>+</sup> 704.9998, found ( $\text{M} + \text{Na}$ )<sup>+</sup> 704.9991.

### A.3.) Identification of FL172 from an initial library of octahedral ruthenium complexes

Reactions were executed by the reaction of precursor complex **3** with CO plus different bidentate ligands, affording complexes of type **S1** (Figure S5), in analogy to the synthesis of **FL172** and **FL411** (see part A.2).

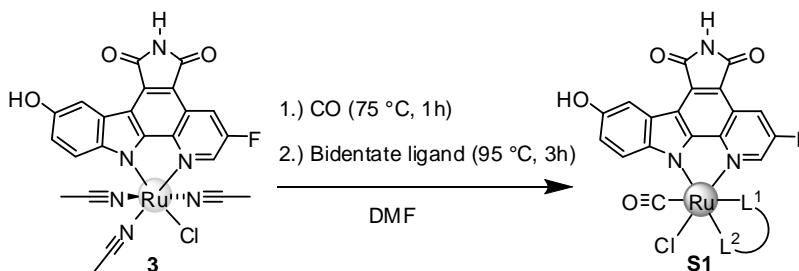

**Figure S5.** Bidentate ligands used for the synthesis of octahedral ruthenium complexes.

The products were purified by silica gel chromatography and the constitutions each confirmed by mass spectrometry and  $^1\text{H-NMR}$  analysis. Relative configurations were assigned by  $^1\text{H-NMR}$  based on the presence or absence of upfield shifted indole H-9 protons produced by the ring-current of adjacent conjugated aromatic  $\pi$ -systems (Figure S6), whereas **FL162-1** and **FL162-2** were assigned by their retention times during silica gel chromatography. A subset of bidentate ligands afforded mixtures of multiple isomers which could not be resolved (data not shown). Such mixtures were not considered for further studies. Figure S7 shows the molecular structures of synthesized and characterized complexes. Initial inhibitory activities were tested against PAK1 at a single concentration of 1  $\mu\text{M}$  at an ATP concentration of 1  $\mu\text{M}$  (Figure S8). Overall, **FL172** showed the most promising inhibitory properties (18% activity at 1  $\mu\text{M}$  with 1  $\mu\text{M}$  ATP).

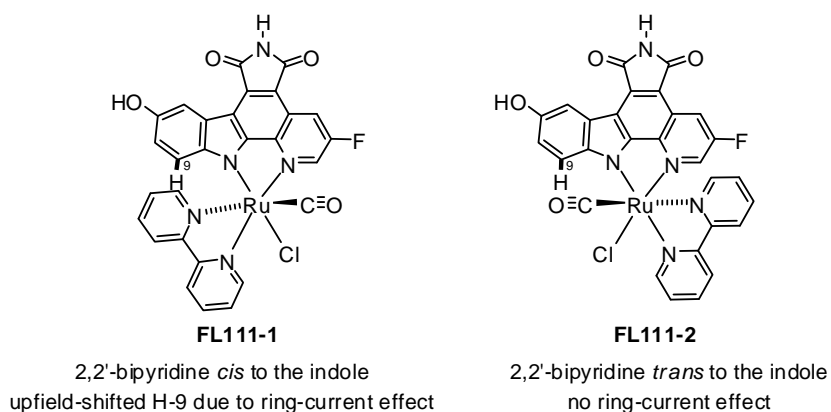

**Figure S6.** Example of the assignment of the relative stereochemistry of octahedral complexes in Figure S7 by  $^1\text{H}$ -NMR spectroscopy.

**Complex FL115-1.**  $^1\text{H}$  NMR (300 MHz, acetone- $d_6$ ):  $\delta$  (ppm) 9.86 (s, 1H), 9.36 (d,  $J = 8.9$  Hz, 1H), 9.20 (t,  $J = 2.6$  Hz, 1H), 8.81 (dd,  $J = 9.4, 2.6$  Hz, 1H), 8.20 (d,  $J = 2.2$  Hz, 1H), 8.12 (s, 1H), 8.08 (td,  $J = 7.8, 1.5$  Hz, 1H), 7.67 (m, 2H), 6.78 (dd,  $J = 8.8, 2.6$  Hz, 1H), 5.96 (d,  $J = 8.9$  Hz, 1H), 4.82 (m, 3H), 4.22 (m, 1H). HRMS calculated for  $\text{C}_{24}\text{H}_{16}\text{ClFN}_5\text{O}_4\text{Ru}$  ( $\text{M} + \text{H}$ ) $^+$  593.9913, found ( $\text{M} + \text{H}$ ) $^+$  593.9949.

**Complex FL115-2.**  $^1\text{H}$  NMR (300 MHz, acetone- $d_6$ ):  $\delta$  (ppm) 9.82 (s, 1H), 9.25 (d,  $J = 5.2$  Hz, 1H), 8.74 (dd,  $J = 9.5, 2.4$  Hz, 1H), 8.45 (d,  $J = 8.9$  Hz, 1H), 8.21 (d,  $J = 2.4$  Hz, 1H), 8.10 (s, 1H), 8.02 (td,  $J = 7.7, 1.5$  Hz, 1H), 7.90 (m, 1H), 7.69 (d,  $J = 7.8$  Hz, 1H), 7.60 (m, 1H), 7.09 (dd,  $J = 8.9, 2.6$  Hz, 1H), 4.92 (m, 3H), 4.51 (m, 1H). HRMS calculated for  $\text{C}_{24}\text{H}_{16}\text{ClFN}_5\text{O}_4\text{Ru}$  ( $\text{M} + \text{H}$ ) $^+$  593.9913, found ( $\text{M} + \text{H}$ ) $^+$  593.9934.

**Complex FL114-1.** Formed as two diastereoisomers with the ratio of approximately 1:1.  $^1\text{H}$  NMR (300 MHz, acetone- $d_6$ ):  $\delta$  (ppm) 9.86 (s, 2H), 9.48 (m, 1H), 9.37 (m, 1H), 9.23 (t,  $J = 2.7$  Hz, 1H), 9.17 (t,  $J = 2.6$  Hz, 1H), 8.82 (dd,  $J = 9.4, 2.5$  Hz, 2H), 8.20-8.08 (m, 6H), 7.69-7.65 (m, 4H), 6.78 (m, 2H), 6.07 (d,  $J = 8.8$  Hz, 1H), 5.89 (d,  $J = 8.7$  Hz, 1H), 5.31 (m, 2H),

5.16 (m, 1H), 4.55 (m, 1H), 4.30 (m, 2H), 1.71 (d,  $J = 6.3$  Hz, 3H), 1.42 (d,  $J = 7.0$  Hz, 3H).

HRMS calculated for  $C_{25}H_{18}ClFN_5O_4Ru$  ( $M + H$ )<sup>+</sup> 608.0069, found ( $M + H$ )<sup>+</sup> 608.0057.

**Complex FL114-2.** Formed as two diastereomers with the ratio of approximately 1:1. <sup>1</sup>H NMR (300 MHz, acetone-*d*<sub>6</sub>):  $\delta$  (ppm) 9.81 (s, 2H), 9.36 (m, 1H), 9.24 (m, 1H), 8.76-8.69 (m, 2H), 8.49 (d,  $J = 8.8$  Hz, 1H), 8.41 (d,  $J = 8.9$  Hz, 1H), 8.21 (d,  $J = 2.5$  Hz, 2H), 8.11-8.04 (m, 4H), 7.91 (t,  $J = 2.5$  Hz, 1H), 7.85 (t,  $J = 2.5$  Hz, 1H), 7.69-7.57 (m, 4H), 7.10 (dd,  $J = 2.5, 1.5$  Hz, 1H), 7.07 (dd,  $J = 2.5, 1.5$  Hz, 1H), 5.29 (m, 3H), 4.60 (m, 2H), 4.45 (m, 1H), 1.78 (d,  $J = 6.6$  Hz, 3H), 1.64 (d,  $J = 6.7$  Hz, 3H). HRMS calculated for  $C_{25}H_{18}ClFN_5O_4Ru$  ( $M + H$ )<sup>+</sup> 608.0069, found ( $M + H$ )<sup>+</sup> 608.0059.

**Complex FL111-1.** <sup>1</sup>H NMR (300 MHz, acetone-*d*<sub>6</sub>):  $\delta$  (ppm) 9.88 (s, 1H), 9.79 (d,  $J = 5.8$  Hz, 1H), 9.40 (t,  $J = 2.8$  Hz, 1H), 8.96 (dd,  $J = 9.3, 2.5$  Hz, 1H), 8.77 (d,  $J = 8.1$  Hz, 1H), 8.63 (d,  $J = 8.4$  Hz, 1H), 8.38 (td,  $J = 8.0, 1.5$  Hz, 1H), 8.11-8.01 (m, 3H), 7.93 (m, 1H), 7.76 (d,  $J = 5.5$  Hz, 1H), 7.35 (m, 1H), 6.69 (dd,  $J = 8.8, 2.6$  Hz, 1H), 5.84 (d,  $J = 8.8$  Hz, 1H). HRMS calculated for  $C_{28}H_{15}Cl_2FN_5O_4Ru$  ( $M + Cl$ )<sup>-</sup> 675.9529, found ( $M + Cl$ )<sup>-</sup> 675.9471.

**Complex FL111-2.** <sup>1</sup>H NMR (300 MHz, acetone-*d*<sub>6</sub>):  $\delta$  (ppm) 9.87 (s, 1H), 9.61 (d,  $J = 5.6$  Hz, 1H), 8.74 (d,  $J = 7.9$  Hz, 1H), 8.68-8.64 (m, 2H), 8.55 (d,  $J = 8.9$  Hz, 1H), 8.32-8.27 (m, 2H), 8.19 (s, 1H), 8.11 (td,  $J = 8.1, 1.6$  Hz, 1H), 7.87 (m, 1H), 7.80 (t,  $J = 2.6$  Hz, 1H), 7.52 (d,  $J = 5.4$  Hz, 1H), 7.35 (m, 1H), 7.15 (dd,  $J = 8.9, 2.6$  Hz, 1H). HRMS calculated for  $C_{28}H_{16}ClFN_5O_4Ru$  ( $M + H$ )<sup>+</sup> 641.9913, found ( $M + H$ )<sup>+</sup> 641.9898.

**Complex FL161-1.** <sup>1</sup>H NMR (300 MHz, acetone-*d*<sub>6</sub>):  $\delta$  (ppm) 9.89 (s, 1H), 9.38 (t,  $J = 2.6$  Hz, 1H), 8.96 (dd,  $J = 9.3, 2.5$  Hz, 1H), 8.56 (t,  $J = 8.3$  Hz, 2H), 8.23 (t,  $J = 7.9$  Hz, 1H), 8.10-7.94 (m, 4H), 7.71 (d,  $J = 5.5$  Hz, 1H), 7.31 (m, 1H), 6.70 (dd,  $J = 8.8, 2.6$  Hz, 1H), 5.78 (d,  $J = 8.9$  Hz, 1H), 3.46 (s, 3H). HRMS calculated for  $C_{29}H_{18}ClFN_5O_4Ru$  ( $M + H$ )<sup>+</sup> 656.0069, found ( $M + H$ )<sup>+</sup> 656.0052.

**Complex FL161-2.**  $^1\text{H}$  NMR (300 MHz, acetone- $d_6$ ):  $\delta$  (ppm) 9.88 (s, 1H), 8.66-8.53 (m, 4H), 8.31 (d,  $J = 2.6$  Hz, 1H), 8.21 (s, 1H), 8.16 (t,  $J = 7.9$  Hz, 1H), 8.07 (td,  $J = 8.2, 1.7$  Hz, 1H), 7.88 (d,  $J = 7.8$  Hz, 1H), 7.71 (t,  $J = 2.2$  Hz, 1H), 7.49 (d,  $J = 5.5$  Hz, 1H), 7.30 (m, 1H), 7.16 (dd,  $J = 8.9, 2.6$  Hz, 1H), 3.41 (s, 3H). HRMS calculated for  $\text{C}_{29}\text{H}_{18}\text{Cl}_2\text{FN}_5\text{O}_4\text{Ru}$  ( $\text{M} + \text{Cl}$ ) $^-$  689.9685, found ( $\text{M} + \text{Cl}$ ) $^-$  689.9655.

**Complex FL174-1.** HRMS calculated for  $\text{C}_{34}\text{H}_{19}\text{ClFN}_5\text{O}_4\text{Ru}$  ( $\text{M}$ ) $^+$  717.0153, found ( $\text{M}$ ) $^+$  717.0350.

**Complex FL174-2.**  $^1\text{H}$  NMR (300 MHz, acetone- $d_6$ ):  $\delta$  (ppm) 9.83 (s, 1H), 8.77 (dd,  $J = 8.2, 1.3$  Hz, 1H), 8.67 (d,  $J = 8.2$  Hz, 1H), 8.62-8.56 (m, 2H), 8.33 (t,  $J = 7.9$  Hz, 1H), 8.26 (d,  $J = 2.6$  Hz, 1H), 8.17 (s, 1H), 8.15-7.81 (m, 4H), 7.61-7.48 (m, 5H), 7.35 (m, 1H), 7.12 (dd,  $J = 8.8, 2.6$  Hz, 1H). HRMS calculated for  $\text{C}_{34}\text{H}_{20}\text{ClFN}_5\text{O}_4\text{Ru}$  ( $\text{M} + \text{H}$ ) $^+$  718.0226, found ( $\text{M} + \text{H}$ ) $^+$  718.0204.

**Complex FL178.**  $^1\text{H}$  NMR (300 MHz, acetone- $d_6$ ):  $\delta$  (ppm) 9.85 (s, 1H), 8.64-8.60 (m, 2H), 8.55 (d,  $J = 8.2$  Hz, 1H), 8.40 (d,  $J = 8.0$  Hz, 1H), 8.28 (d,  $J = 2.6$  Hz, 1H), 8.19-8.14 (m, 2H), 7.87 (t,  $J = 7.9$  Hz, 1H), 7.80 (d,  $J = 7.8$  Hz, 1H), 7.29 (m, 1H), 7.20 (dd,  $J = 8.9, 2.6$  Hz, 1H), 7.15 (d,  $J = 7.9$  Hz, 1H), 3.45 (s, 3H), 1.93 (s, 3H). HRMS calculated for  $\text{C}_{30}\text{H}_{20}\text{ClFN}_5\text{O}_4\text{Ru}$  ( $\text{M} + \text{H}$ ) $^+$  670.0226, found ( $\text{M} + \text{H}$ ) $^+$  670.0225.

**Complex FL134.**  $^1\text{H}$  NMR (300 MHz, acetone- $d_6$ ):  $\delta$  (ppm) 9.87 (s, 1H), 9.41 (s, 1H), 8.65 (dd,  $J = 9.5, 2.4$  Hz, 1H), 8.55 (d,  $J = 8.7$  Hz, 2H), 8.48 (d,  $J = 8.3$  Hz, 1H), 8.32 (d,  $J = 2.6$  Hz, 1H), 8.18 (s, 1H), 8.08 (d,  $J = 8.3$  Hz, 1H), 7.89 (d,  $J = 8.4$  Hz, 1H), 7.77 (t,  $J = 2.5$  Hz, 1H), 7.36 (m, 1H), 7.15 (dd,  $J = 8.9, 2.6$  Hz, 1H), 2.64 (s, 3H), 1.92 (s, 3H). HRMS calculated for  $\text{C}_{30}\text{H}_{20}\text{ClFN}_5\text{O}_4\text{Ru}$  ( $\text{M} + \text{H}$ ) $^+$  670.0226, found ( $\text{M} + \text{H}$ ) $^+$  670.0203.

**Complex FL151-1.**  $^1\text{H}$  NMR (300 MHz, DMSO- $d_6$ ):  $\delta$  (ppm) 11.13 (s, 1H), 10.05 (dd,  $J = 5.3, 1.1$  Hz, 1H), 9.27 (t,  $J = 2.6$  Hz, 1H), 9.04 (s, 1H), 9.00 (dd,  $J = 8.3, 1.1$  Hz, 1H), 8.95 (dd,  $J = 9.2, 2.5$  Hz, 1H), 8.74 (dd,  $J = 8.3, 1.2$  Hz, 1H), 8.40-8.22 (m, 3H), 8.01 (dd,  $J = 5.1, 1.2$  Hz, 1H), 7.88 (d,  $J = 2.4$  Hz, 1H), 7.71 (dd,  $J = 8.2, 5.1$  Hz, 1H), 6.40 (dd,  $J = 8.8, 2.5$  Hz, 1H), 5.31 (d,  $J = 8.8$  Hz, 1H). HRMS calculated for  $\text{C}_{30}\text{H}_{16}\text{ClFN}_5\text{O}_4\text{Ru}$  ( $\text{M} + \text{H}$ ) $^+$  665.9913, found ( $\text{M} + \text{H}$ ) $^+$  665.9923.

**Complex FL151-2.**  $^1\text{H}$  NMR (300 MHz, acetone- $d_6$ ):  $\delta$  (ppm) 9.97 (dd,  $J = 5.2, 1.3$  Hz, 1H), 9.89 (s, 1H), 8.91 (dd,  $J = 8.3, 1.3$  Hz, 1H), 8.73 (dd,  $J = 8.2, 1.4$  Hz, 1H), 8.63-8.59 (m, 2H), 8.38-8.21 (m, 5H), 7.83 (dd,  $J = 5.1, 1.5$  Hz, 1H), 7.77-7.70 (m, 2H), 7.17 (dd,  $J = 8.8, 2.6$  Hz, 1H). HRMS calculated for  $\text{C}_{30}\text{H}_{16}\text{ClFN}_5\text{O}_4\text{Ru}$  ( $\text{M} + \text{H}$ ) $^+$  665.9913, found ( $\text{M} + \text{H}$ ) $^+$  665.9906.

**Complex FL182-1.**  $^1\text{H}$  NMR (300 MHz, acetone- $d_6$ ):  $\delta$  (ppm) 9.89 (s, 1H), 9.74 (m, 1H), 9.31 (t,  $J = 2.6$  Hz, 1H), 8.90 (dd,  $J = 9.3, 2.6$  Hz, 1H), 8.39 (td,  $J = 7.8, 1.4$  Hz, 1H), 8.21-8.17 (m, 2H), 8.11 (s, 1H), 8.06 (m, 1H), 6.74 (dd,  $J = 8.8, 2.6$  Hz, 1H), 5.92 (d,  $J = 8.8$  Hz, 1H), 4.92 (m, 1H), 4.68 (m, 1H), 3.89 (m, 1H), 3.17 (m, 1H). HRMS calculated for  $\text{C}_{26}\text{H}_{16}\text{ClFN}_5\text{O}_5\text{Ru}$  ( $\text{M} + \text{H}$ ) $^+$  633.9862, found ( $\text{M} + \text{H}$ ) $^+$  633.9844.

**Complex FL182-2.**  $^1\text{H}$  NMR (300 MHz, acetone- $d_6$ ):  $\delta$  (ppm) 9.85 (s, 1H), 9.53 (m, 1H), 8.71 (dd,  $J = 9.5, 2.4$  Hz, 1H), 8.51 (d,  $J = 8.9$  Hz, 1H), 8.31 (td,  $J = 7.8, 1.4$  Hz, 1H), 8.25 (d,  $J = 2.6$  Hz, 1H), 8.16 (m, 1H), 8.12 (s, 1H), 7.97 (m, 1H), 7.93 (t,  $J = 2.5$  Hz, 1H), 7.11 (dd,  $J = 8.9, 2.6$  Hz, 1H), 4.91 (m, 1H), 4.64 (m, 1H), 3.66 (m, 1H), 3.12 (m, 1H). HRMS calculated for  $\text{C}_{26}\text{H}_{16}\text{ClFN}_5\text{O}_5\text{Ru}$  ( $\text{M} + \text{H}$ ) $^+$  633.9862, found ( $\text{M} + \text{H}$ ) $^+$  633.9841.

**Complex FL162-1.**  $^1\text{H}$  NMR (300 MHz, acetone- $d_6$ ):  $\delta$  (ppm) 9.89 (s, 1H), 9.26 (m, 1H), 8.88 (dd,  $J = 9.3, 2.5$  Hz, 1H), 8.21 (dd,  $J = 2.3, 0.8$  Hz, 1H), 8.17 (s, 1H), 7.10-7.02 (m, 2H),

5.44 (m, 2H), 4.95 (m, 2H), 4.71 (m, 1H), 4.49 (m, 1H), 3.84 (m, 1H), 3.16 (m, 1H). HRMS calculated for  $C_{24}H_{16}ClFN_5O_6Ru$  ( $M + H$ )<sup>+</sup> 625.9811, found ( $M + H$ )<sup>+</sup> 625.9795.

**Complex FL162-2.** <sup>1</sup>H NMR (300 MHz, acetone-*d*<sub>6</sub>): δ (ppm) 9.84 (s, 1H), 8.74 (dd, *J* = 9.6, 2.4 Hz, 1H), 8.56 (t, *J* = 2.5 Hz, 1H), 8.46 (d, *J* = 8.9 Hz, 1H), 8.23 (d, *J* = 2.6 Hz, 1H), 8.09 (s, 1H), 7.09 (dd, *J* = 8.9, 2.6 Hz, 1H), 5.27 (m, 2H), 4.91 (m, 2H), 4.65 (m, 1H), 4.33 (m, 1H), 3.60 (m, 1H), 3.11 (m, 1H). HRMS calculated for  $C_{24}H_{16}ClFN_5O_6Ru$  ( $M + H$ )<sup>+</sup> 625.9811, found ( $M + H$ )<sup>+</sup> 625.9799.

**Complex FL306.** <sup>1</sup>H NMR (300 MHz, acetone-*d*<sub>6</sub>): δ (ppm) 9.85 (s, 1H), 9.59 (dd, *J* = 5.6, 1.1 Hz, 1H), 8.65-8.58 (m, 2H), 8.50 (d, *J* = 7.9 Hz, 1H), 8.41-8.33 (m, 2H), 8.22 (t, *J* = 7.7 Hz, 1H), 7.86-7.82 (m, 2H), 7.63 (m, 1H), 7.42 (d, *J* = 8.2 Hz, 1H), 7.17 (dd, *J* = 8.9, 2.6 Hz, 1H), 7.07 (m, 1H), 6.61 (m, 1H), 5.50 (d, *J* = 8.4 Hz, 1H). HRMS calculated for  $C_{30}H_{16}ClFN_6O_4Ru$  ( $M + Na$ )<sup>+</sup> 702.9841, found ( $M + Na$ )<sup>+</sup> 702.9857.

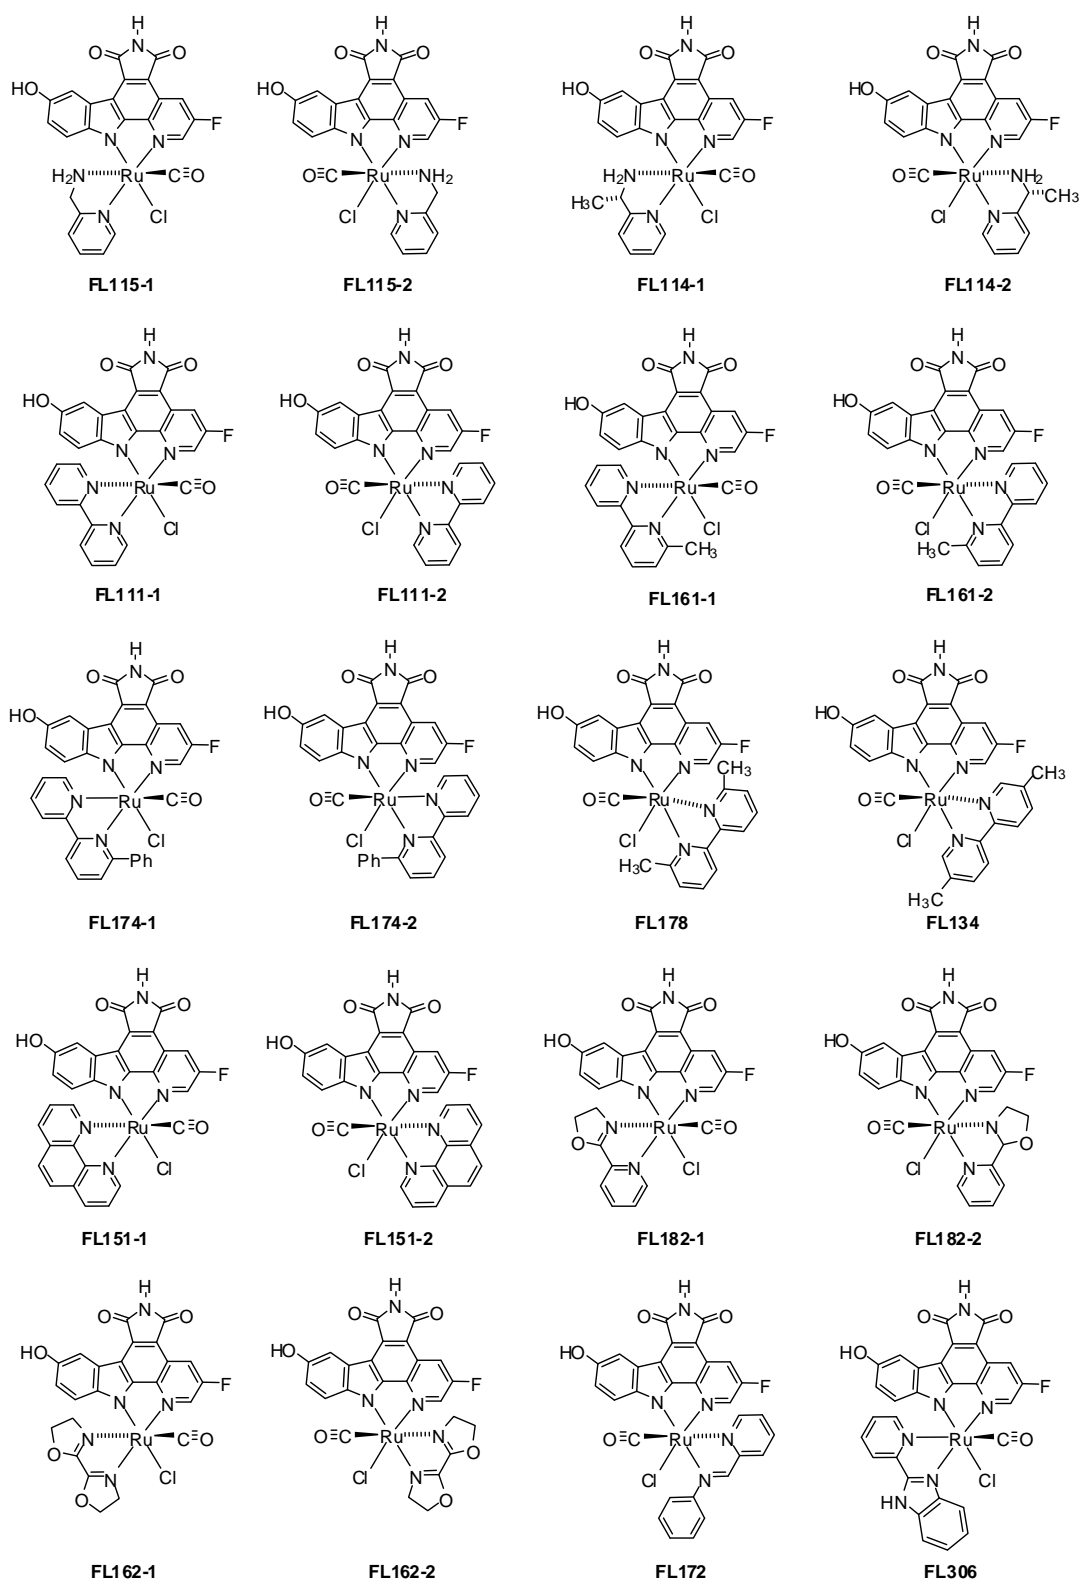

**Figure S7.** Structures of a library of octahedral complexes with a variety of large and rigid bidentate ligands. All compounds are racemic mixtures, except for **FL114-1** and **FL114-2** which are mixtures of diastereomers.



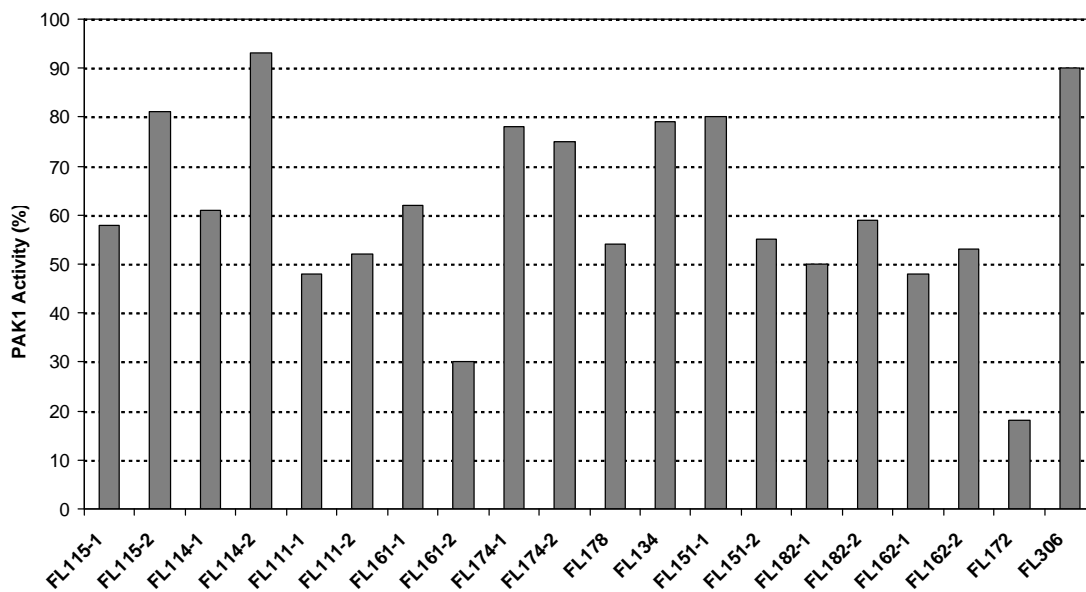

**Figure S8.** Inhibition of PAK1 by octahedral complexes at a concentration of 1  $\mu\text{M}$  (1  $\mu\text{M}$  ATP).

#### A.4.) Identification of FL411 from a library of FL172 derivatives

Derivatives of **FL172** were synthesized in analogy to **FL172** by using derivatized 2-(phenylaminomethyl)pyridines (Figure S9a). Kinase inhibition data are shown in Figure S9b,c.

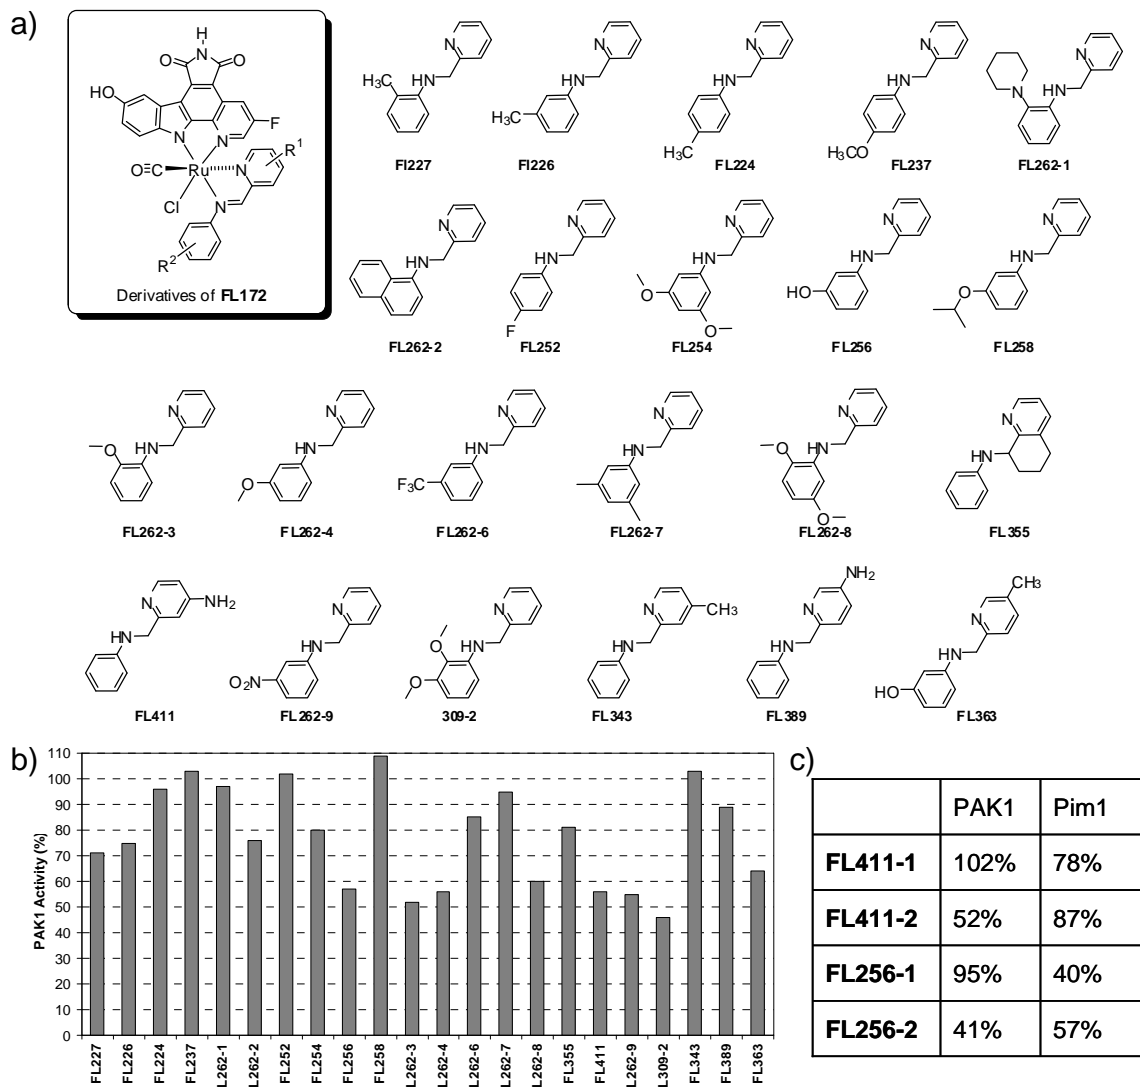

**Figure S9.** a) Library of **FL172** derivatives. b) Inhibition of PAK1 by racemic derivatives of **FL172** at a concentration of 0.1  $\mu$ M (1  $\mu$ M ATP). c.) Compounds **FL411** and **FL256** were selected and resolved into their individual enantiomers (**FL411-1**, **FL411-2** and **FL256-1**, **FL256-2**, respectively) by chiral HPLC and measured against PAK1 and Pim1 at a

concentration of 0.1  $\mu\text{M}$  (1  $\mu\text{M}$  ATP). **FL411-1** and **FL411-2** were later assigned to  $\Delta$ -**FL411** and  $\Lambda$ -**FL411**, respectively (see part A.6.)

**Complex FL227.**  $^1\text{H}$  NMR (300 MHz, acetone- $d_6$ ):  $\delta$  (ppm) 9.89 (s, 1H), 9.18 (s, 1H), 8.73 (dd,  $J = 9.3, 2.4$  Hz, 1H), 8.63 (m, 1H), 8.59 (d,  $J = 8.9$  Hz, 1H), 8.42 (m, 1H), 8.31 (d,  $J = 2.5$  Hz, 1H), 8.184 (s, 1H), 8.180 (td,  $J = 7.8, 1.6$  Hz, 1H), 8.05 (d,  $J = 7.7$  Hz, 1H), 7.57-7.35 (m, 5H), 7.12 (dd,  $J = 8.9, 2.6$  Hz, 1H), 2.64 (s, 3H). HRMS calculated for  $\text{C}_{31}\text{H}_{19}\text{ClFN}_5\text{O}_4\text{Ru}$  ( $\text{M} + \text{Na}$ ) $^+$  704.0045, found ( $\text{M} + \text{Na}$ ) $^+$  704.0043.

**Complex FL226.**  $^1\text{H}$  NMR (300 MHz, acetone- $d_6$ ):  $\delta$  (ppm) 9.88 (s, 1H), 9.21 (s, 1H), 8.69 (dd,  $J = 9.4, 2.4$  Hz, 1H), 8.59 (d,  $J = 8.9$  Hz, 1H), 8.37 (m, 1H), 8.34 (t,  $J = 2.5$  Hz, 1H), 8.31 (d,  $J = 2.6$  Hz, 1H), 8.19 (s, 1H), 8.16 (td,  $J = 7.7, 1.8$  Hz, 1H), 7.95-7.92 (m, 2H), 7.56 (t,  $J = 7.7$  Hz, 1H), 7.49-7.39 (m, 3H), 7.15 (dd,  $J = 8.9, 2.6$  Hz, 1H), 2.52 (s, 3H). HRMS calculated for  $\text{C}_{31}\text{H}_{19}\text{ClFN}_5\text{O}_4\text{Ru}$  ( $\text{M} + \text{Na}$ ) $^+$  704.0045, found ( $\text{M} + \text{Na}$ ) $^+$  704.0055.

**Complex FL224.**  $^1\text{H}$  NMR (300 MHz, acetone- $d_6$ ):  $\delta$  (ppm) 9.88 (s, 1H), 9.18 (s, 1H), 8.69 (dd,  $J = 9.4, 2.4$  Hz, 1H), 8.59 (d,  $J = 8.9$  Hz, 1H), 8.36 (m, 1H), 8.33-8.31 (m, 2H), 8.20 (s, 1H), 8.15 (td,  $J = 7.7, 1.8$  Hz, 1H), 8.03-8.00 (m, 2H), 7.50-7.40 (m, 4H), 7.15 (dd,  $J = 8.9, 2.6$  Hz, 1H), 2.47 (s, 3H). HRMS calculated for  $\text{C}_{31}\text{H}_{20}\text{ClFN}_5\text{O}_4\text{Ru}$  ( $\text{M} + \text{H}$ ) $^+$  682.0226, found ( $\text{M} + \text{H}$ ) $^+$  682.0231.

**Complex FL237.**  $^1\text{H}$  NMR (300 MHz, acetone- $d_6$ ):  $\delta$  (ppm) 9.88 (s, 1H), 9.15 (s, 1H), 8.68 (dd,  $J = 9.4, 2.3$  Hz, 1H), 8.59 (d,  $J = 8.9$  Hz, 1H), 8.35-8.30 (m, 3H), 8.19 (s, 1H), 8.16-8.07 (m, 3H), 7.48-7.39 (m, 2H), 7.24-7.19 (m, 2H), 7.15 (dd,  $J = 8.9, 2.6$  Hz, 1H), 3.94 (s, 3H). HRMS calculated for  $\text{C}_{31}\text{H}_{19}\text{ClFN}_5\text{O}_6\text{Ru}$  ( $\text{M} + \text{Na}$ ) $^+$  719.9994, found ( $\text{M} + \text{Na}$ ) $^+$  719.9999.

**Complex FL262-1.** HRMS calculated for  $\text{C}_{35}\text{H}_{27}\text{ClFN}_6\text{O}_4\text{Ru}$  ( $\text{M} + \text{H}$ ) $^+$  751.0810, found ( $\text{M} + \text{H}$ ) $^+$  751.0784.

**Complex FL262-2.** HRMS calculated for  $C_{36}H_{22}FN_6O_4Ru$  (M - Cl +  $CH_3CN$ )<sup>+</sup> 723.0730, found (M - Cl +  $CH_3CN$ )<sup>+</sup> 723.0787.

**Complex FL252.** <sup>1</sup>H NMR (300 MHz, acetone-*d*<sub>6</sub>): δ (ppm) 9.89 (s, 1H), 9.23 (s, 1H), 8.69 (dd, *J* = 9.4, 2.4 Hz, 1H), 8.57 (d, *J* = 8.9 Hz, 1H), 8.38 (m, 1H), 8.36 (t, *J* = 2.5 Hz, 1H), 8.31 (d, *J* = 2.3 Hz, 1H), 8.23-8.14 (m, 4H), 7.51-7.43 (m, 4H), 7.15 (dd, *J* = 8.9, 2.6 Hz, 1H). HRMS calculated for  $C_{30}H_{17}ClF_2N_5O_4Ru$  (M + H)<sup>+</sup> 685.9975, found (M + H)<sup>+</sup> 685.9981.

**Complex FL254.** <sup>1</sup>H NMR (300 MHz, acetone-*d*<sub>6</sub>): δ (ppm) 9.89 (s, 1H), 9.23 (s, 1H), 8.68 (dd, *J* = 9.4, 2.4 Hz, 1H), 8.59 (d, *J* = 8.9 Hz, 1H), 8.38-8.34 (m, 2H), 8.31 (d, *J* = 2.6 Hz, 1H), 8.21 (s, 1H), 8.16 (td, *J* = 7.6, 1.8 Hz, 1H), 7.50-7.42 (m, 2H), 7.39 (d, *J* = 2.3 Hz, 2H), 7.15 (dd, *J* = 8.9, 2.6 Hz, 1H), 6.67 (t, *J* = 2.2 Hz, 1H), 3.94 (s, 6H). HRMS calculated for  $C_{32}H_{22}ClFN_5O_6Ru$  (M + H)<sup>+</sup> 728.0281, found (M + H)<sup>+</sup> 728.0286.

**Complex FL256.** <sup>1</sup>H NMR (300 MHz, acetone-*d*<sub>6</sub>): δ (ppm) 9.89 (s, 1H), 9.18 (s, 1H), 9.10 (br, 1H), 8.69 (dd, *J* = 9.4, 2.4 Hz, 1H), 8.59 (d, *J* = 9.2 Hz, 1H), 8.37 (m, 1H), 8.34 (t, *J* = 2.5 Hz, 1H), 8.31 (d, *J* = 2.5 Hz, 1H), 8.21 (s, 1H), 8.15 (td, *J* = 7.7, 1.8 Hz, 1H), 7.62 (t, *J* = 2.1 Hz, 1H), 7.57-7.41 (m, 4H), 7.15 (dd, *J* = 8.9, 2.6 Hz, 1H), 7.04 (m, 1H). HRMS calculated for  $C_{30}H_{17}ClFN_5O_5Ru$  (M + Na)<sup>+</sup> 7005.9838, found (M + Na)<sup>+</sup> 705.9897.

**Complex FL258.** <sup>1</sup>H NMR (300 MHz, acetone-*d*<sub>6</sub>): δ (ppm) 9.88 (s, 1H), 9.21 (s, 1H), 8.69 (dd, *J* = 9.4, 2.3 Hz, 1H), 8.59 (d, *J* = 8.9 Hz, 1H), 8.37 (m, 1H), 8.34 (t, *J* = 2.5 Hz, 1H), 8.31 (d, *J* = 2.6 Hz, 1H), 8.21 (s, 1H), 8.16 (td, *J* = 7.7, 1.8 Hz, 1H), 7.78 (t, *J* = 2.2 Hz, 1H), 7.66 (m, 1H), 7.55 (t, *J* = 8.0 Hz, 1H), 7.50-7.42 (m, 2H), 7.15 (dd, *J* = 8.9, 2.6 Hz, 1H), 7.11 (m, 1H), 4.81 (m, 1H), 1.41 (m, 6H). HRMS calculated for  $C_{33}H_{24}ClFN_5O_5Ru$  (M + H)<sup>+</sup> 726.0488, found (M + H)<sup>+</sup> 726.0508.

**Complex FL262-3.**  $^1\text{H}$  NMR (300 MHz, acetone- $d_6$ ):  $\delta$  (ppm) 9.87 (s, 1H), 9.19 (s, 1H), 8.82 (dd,  $J = 3.4, 2.4$  Hz, 1H), 8.70 (dd,  $J = 9.2, 2.4$  Hz, 1H), 8.58 (d,  $J = 8.9$  Hz, 1H), 8.38 (m, 1H), 8.31 (d,  $J = 2.6$  Hz, 1H), 8.17 (s, 1H), 8.16 (td,  $J = 7.7, 1.7$  Hz, 1H), 8.03 (dd,  $J = 7.9, 1.6$  Hz, 1H), 7.53-7.39 (m, 4H), 7.21 (m, 1H), 7.13 (dd,  $J = 8.9, 2.6$  Hz, 1H), 4.14 (s, 3H). HRMS calculated for  $\text{C}_{31}\text{H}_{19}\text{ClFN}_5\text{O}_6\text{Ru}$  ( $\text{M} + \text{Na}$ ) $^+$  719.9994, found ( $\text{M} + \text{Na}$ ) $^+$  720.0002. And the amino-complex is also isolated in this reaction:  $^1\text{H}$  NMR (300 MHz, acetone- $d_6$ ):  $\delta$  (ppm) 9.87 (s, 1H), 9.24 (dd,  $J = 3.9, 2.4$  Hz, 1H), 8.81 (dd,  $J = 9.2, 2.4$  Hz, 1H), 8.58 (d,  $J = 8.9$  Hz, 1H), 8.27 (d,  $J = 2.5$  Hz, 1H), 8.16 (m, 1H), 8.11 (s, 1H), 7.89 (td,  $J = 7.3, 2.0$  Hz, 1H), 7.79-7.72 (m, 2H), 7.32-7.23 (m, 2H), 7.14-7.03 (m, 4H), 5.81 (dd,  $J = 14.1, 10.9$  Hz, 1H), 4.54 (dd,  $J = 14.4, 3.9$  Hz, 1H), 4.13 (s, 3H).

**Complex FL262-4.** HRMS calculated for  $\text{C}_{31}\text{H}_{19}\text{ClFN}_5\text{O}_6\text{Ru}$  ( $\text{M} + \text{Na}$ ) $^+$  719.9994, found ( $\text{M} + \text{Na}$ ) $^+$  719.9998.

**Complex FL262-6.** HRMS calculated for  $\text{C}_{31}\text{H}_{16}\text{Cl}_2\text{F}_4\text{N}_5\text{O}_4\text{Ru}$  ( $\text{M} + \text{Cl}$ ) $^-$  769.9559, found ( $\text{M} + \text{Cl}$ ) $^-$  769.9484.

**Complex FL262-7.** HRMS calculated for  $\text{C}_{34}\text{H}_{24}\text{FN}_6\text{O}_4\text{Ru}$  ( $\text{M} - \text{Cl} + \text{CH}_3\text{CN}$ ) $^+$  701.0887, found ( $\text{M} - \text{Cl} + \text{CH}_3\text{CN}$ ) $^+$  701.0856.

**Complex FL262-8.** HRMS calculated for  $\text{C}_{32}\text{H}_{22}\text{ClFN}_5\text{O}_6\text{Ru}$  ( $\text{M} + \text{H}$ ) $^+$  728.0281, found ( $\text{M} + \text{H}$ ) $^+$  728.0287.

**Complex FL355.**  $^1\text{H}$  NMR (300 MHz, acetone- $d_6$ ):  $\delta$  (ppm) 9.86 (s, 1H), 8.69 (dd,  $J = 9.4, 2.3$  Hz, 1H), 8.58-8.55 (m, 2H), 8.29 (d, d,  $J = 2.6$  Hz, 1H), 8.17 (s, 1H), 7.97-7.34 (m, 8H), 7.12 (dd,  $J = 8.9, 2.6$  Hz, 1H), 3.39-2.99 (m, 4H), 2.18 (m, 1H), 1.90 (m, 1H). HRMS calculated for  $\text{C}_{33}\text{H}_{22}\text{ClFN}_5\text{O}_4\text{Ru}$  ( $\text{M} + \text{H}$ ) $^+$  708.0382, found ( $\text{M} + \text{H}$ ) $^+$  708.0386.

**Complex FL262-9.**  $^1\text{H}$  NMR (300 MHz, acetone- $d_6$ ):  $\delta$  (ppm) 9.90 (s, 1H), 9.42 (s, 1H), 9.00 (t,  $J = 2.1$  Hz, 1H), 8.71-8.65 (m, 2H), 8.58 (d,  $J = 8.9$  Hz, 1H), 8.48-8.45 (m, 3H), 8.31 (d,  $J = 2.6$  Hz, 1H), 8.21 (s, 1H), 8.21 (td,  $J = 6.9, 2.5$  Hz, 1H), 8.03 (t,  $J = 8.2$  Hz, 1H), 7.54-7.48 (m, 2H), 7.16 (dd,  $J = 8.9, 2.6$  Hz, 1H). HRMS calculated for  $\text{C}_{30}\text{H}_{17}\text{ClFN}_6\text{O}_6\text{Ru}$  ( $\text{M} + \text{H}$ ) $^+$  712.9920, found ( $\text{M} + \text{H}$ ) $^+$  712.9949.

**Complex FL309-2.** HRMS calculated for  $\text{C}_{32}\text{H}_{22}\text{ClFN}_5\text{O}_6\text{Ru}$  ( $\text{M} + \text{H}$ ) $^+$  728.0281, found ( $\text{M} + \text{H}$ ) $^+$  728.0291.

**Complex FL343.**  $^1\text{H}$  NMR (300 MHz, acetone- $d_6$ ):  $\delta$  (ppm) 9.88 (s, 1H), 9.13 (s, 1H), 8.69 (dd,  $J = 9.4, 2.4$  Hz, 1H), 8.58 (d,  $J = 8.9$  Hz, 1H), 8.34 (t,  $J = 2.5$  Hz, 1H), 8.31 (d,  $J = 2.5$  Hz, 1H), 8.20 (s, 1H), 8.18 (m, 1H), 8.13-8.09 (m, 2H), 7.72-7.65 (m, 2H), 7.58 (m, 1H), 7.31-7.24 (m, 2H), 7.15 (dd,  $J = 8.9, 2.6$  Hz, 1H), 2.47 (s, 3H). HRMS calculated for  $\text{C}_{31}\text{H}_{19}\text{ClFN}_5\text{O}_4\text{Ru}$  ( $\text{M} + \text{Na}$ ) $^+$  704.0045, found ( $\text{M} + \text{Na}$ ) $^+$  704.0047.

**Complex FL389.**  $^1\text{H}$  NMR (300 MHz, acetone- $d_6$ ):  $\delta$  (ppm) 9.87 (s, 1H), 8.83 (s, 1H), 8.70 (dd,  $J = 9.4, 2.4$  Hz, 1H), 8.59 (d,  $J = 8.9$  Hz, 1H), 8.31 (t,  $J = 2.5$  Hz, 1H), 8.27 (d,  $J = 2.5$  Hz, 1H), 8.19 (s, 1H), 8.07-8.02 (m, 2H), 7.98 (d,  $J = 8.6$  Hz, 1H), 7.64-7.58 (m, 2H), 7.49 (m, 1H), 7.19-7.11 (m, 2H), 7.05 (d,  $J = 2.6$  Hz, 1H), 6.06 (s, 2H). HRMS calculated for  $\text{C}_{30}\text{H}_{18}\text{ClFN}_6\text{O}_4\text{Ru}$  ( $\text{M} + \text{Na}$ ) $^+$  704.9998, found ( $\text{M} + \text{Na}$ ) $^+$  704.9999.

**Complex FL363.**  $^1\text{H}$  NMR (300 MHz, acetone- $d_6$ ):  $\delta$  (ppm) 9.88 (s, 1H), 9.12 (s, 1H), 9.06 (s, 1H), 8.69 (dd,  $J = 9.5, 2.4$  Hz, 1H), 8.59 (d,  $J = 8.9$  Hz, 1H), 8.33 (t,  $J = 2.5$  Hz, 1H), 8.31 (d,  $J = 2.6$  Hz, 1H), 8.26 (d,  $J = 8.0$  Hz, 1H), 8.20 (s, 1H), 7.96 (m, 1H), 7.59 (m, 1H), 7.53 (m, 1H), 7.47 (t,  $J = 7.9$  Hz, 1H), 7.39 (m, 1H), 7.15 (dd,  $J = 8.9, 2.6$  Hz, 1H), 7.02 (m, 1H), 2.01 (s, 3H). HRMS calculated for  $\text{C}_{31}\text{H}_{20}\text{ClFN}_5\text{O}_5\text{Ru}$  ( $\text{M} + \text{H}$ ) $^+$  698.0175, found ( $\text{M} + \text{H}$ ) $^+$  698.0178.

### A.5.) Crystallographic data of FL389 for the determination of the relative configurations of FL172 and FL411

**Crystal structure of FL389.** This crystal structure verifies the relative configuration of the related complexes **FL172** and **FL411**. **FL389** was synthesized by analogy to **FL172** and **FL411** by reacting precursor **3** first with CO and then 2-(phenylaminomethyl)-5-aminopyridine. Crystals of **FL389** were grown in deuterated acetone overnight.

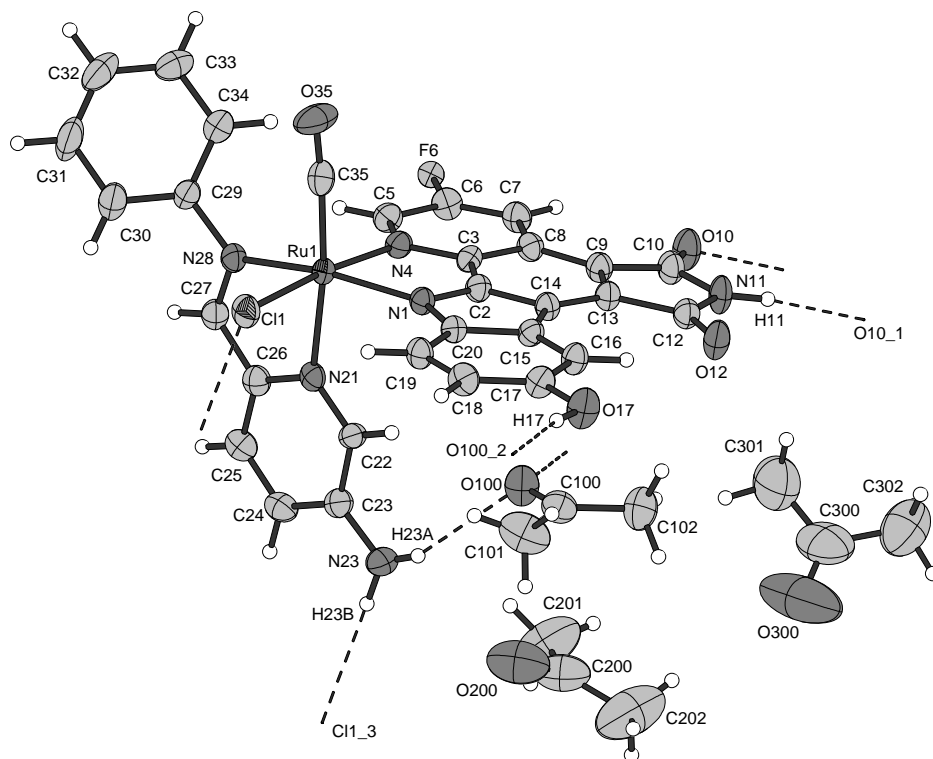

**Figure S10.** ORTEP drawing of compound **FL389** with 50% probability thermal ellipsoid.

**Table S1.** Crystal data and structure refinement for **FL389**.

## Crystal data

|                        |                                                                                             |                                                                                        |
|------------------------|---------------------------------------------------------------------------------------------|----------------------------------------------------------------------------------------|
| Identification code    | FL389                                                                                       |                                                                                        |
| Habitus, colour        | prism, red                                                                                  |                                                                                        |
| Crystal size           | 0.27 x 0.09 x 0.02 mm <sup>3</sup>                                                          |                                                                                        |
| Crystal system         | Triclinic                                                                                   |                                                                                        |
| Space group            | $P \bar{1}$                                                                                 | $Z = 2$                                                                                |
| Unit cell dimensions   | $a = 7.6625(3) \text{ \AA}$<br>$b = 15.8593(6) \text{ \AA}$<br>$c = 15.9895(5) \text{ \AA}$ | $\alpha = 101.764(3)^\circ$<br>$\beta = 92.604(3)^\circ$<br>$\gamma = 96.270(3)^\circ$ |
| Volume                 | 1886.30(12) Å <sup>3</sup>                                                                  |                                                                                        |
| Cell determination     | 18229 peaks with Theta 4.5 to 25°.                                                          |                                                                                        |
| Empirical formula      | C <sub>39</sub> H <sub>36</sub> Cl F N <sub>6</sub> O <sub>7</sub> Ru                       |                                                                                        |
| Formula weight         | 856.26                                                                                      |                                                                                        |
| Density (calculated)   | 1.508 Mg/m <sup>3</sup>                                                                     |                                                                                        |
| Absorption coefficient | 0.550 mm <sup>-1</sup>                                                                      |                                                                                        |
| F(000)                 | 876                                                                                         |                                                                                        |

## Data collection:

|                                 |                                  |
|---------------------------------|----------------------------------|
| Diffractometer type             | IPDS 2T                          |
| Wavelength                      | 0.71073 Å                        |
| Temperature                     | 193(2) K                         |
| Theta range for data collection | 4.64 to 25.00°.                  |
| Index ranges                    | -8<=h<=9, -18<=k<=18, -18<=l<=18 |
| Data collection software        | STOE WinXpose (X-Area)           |
| Cell refinement software        | STOE WinCell (X-Area)            |
| Data reduction software         | STOE WinIntegrate (X-Area)       |

## Solution and refinement:

|                                    |                                                        |
|------------------------------------|--------------------------------------------------------|
| Reflections collected              | 16388                                                  |
| Independent reflections            | 6276 [R(int) = 0.0611]                                 |
| Completeness to theta = 25.00°     | 94.7 %                                                 |
| Observed reflections               | 5215 [I>2sigma(I)]                                     |
| Reflections used for refinement    | 6276                                                   |
| Absorption correction              | Semi-empirical from equivalents                        |
| Max. and min. transmission         | 0.9761 and 0.9054                                      |
| Largest diff. peak and hole        | 0.615 and -0.595 e.Å <sup>-3</sup>                     |
| Solution                           | Direct methods                                         |
| Refinement                         | Full-matrix least-squares on F <sup>2</sup>            |
| Treatment of hydrogen atoms        | Calculated positions, riding model                     |
| Programs used                      | SIR92<br>SHELXL-97<br>Diamond 3.1, STOE IPDS2 software |
| Data / restraints / parameters     | 6276 / 0 / 503                                         |
| Goodness-of-fit on F <sup>2</sup>  | 1.066                                                  |
| R index (all data)                 | wR2 = 0.1015                                           |
| R index conventional [I>2sigma(I)] | R1 = 0.0454                                            |

SIR92: Atomare, A.; Cascarano, G.; Giacovazzo, C.; Guagliardi, A.; Burla, M. C.; Polidori, G.; Camalli, M. J. *Appl. Cryst.* **1994**, *27*, 435.

SHELXL-97: Program for the Refinement of Crystal Structures, G. M. Sheldrick (1997), University of Göttingen, Germany.



**Table S2.** Atomic coordinates and equivalent isotropic displacement parameters ( $\text{\AA}^2$ ) for **FL389**.  $U(\text{eq})$  is defined as one third of the trace of the orthogonalized  $U_{ij}$  tensor.

|      | x           | y           | z           | $U(\text{eq})$ | Occupancy |
|------|-------------|-------------|-------------|----------------|-----------|
| C2   | 0.9858(5)   | 0.8349(2)   | 0.1618(2)   | 0.0266(7)      | 1         |
| C3   | 0.8261(5)   | 0.8562(2)   | 0.1302(2)   | 0.0261(7)      | 1         |
| C5   | 0.6536(5)   | 0.9653(3)   | 0.1209(2)   | 0.0302(8)      | 1         |
| C6   | 0.5258(5)   | 0.9026(3)   | 0.0738(2)   | 0.0306(8)      | 1         |
| C7   | 0.5400(5)   | 0.8171(3)   | 0.0544(2)   | 0.0299(8)      | 1         |
| C8   | 0.6975(5)   | 0.7907(2)   | 0.0842(2)   | 0.0269(8)      | 1         |
| C9   | 0.7386(5)   | 0.7042(2)   | 0.0738(2)   | 0.0284(8)      | 1         |
| C10  | 0.6278(5)   | 0.6231(3)   | 0.0361(2)   | 0.0331(8)      | 1         |
| C12  | 0.8913(5)   | 0.5878(2)   | 0.0853(2)   | 0.0301(8)      | 1         |
| C13  | 0.8974(5)   | 0.6840(2)   | 0.1047(2)   | 0.0274(8)      | 1         |
| C14  | 1.0284(5)   | 0.7487(2)   | 0.1489(2)   | 0.0251(7)      | 1         |
| C15  | 1.2021(5)   | 0.7575(2)   | 0.1900(2)   | 0.0250(7)      | 1         |
| C16  | 1.3197(5)   | 0.6976(2)   | 0.1999(2)   | 0.0291(8)      | 1         |
| C17  | 1.4780(5)   | 0.7285(3)   | 0.2461(2)   | 0.0318(8)      | 1         |
| C18  | 1.5214(5)   | 0.8175(3)   | 0.2817(2)   | 0.0336(9)      | 1         |
| C19  | 1.4090(5)   | 0.8778(3)   | 0.2718(2)   | 0.0293(8)      | 1         |
| C20  | 1.2472(5)   | 0.8476(2)   | 0.2250(2)   | 0.0258(7)      | 1         |
| C22  | 0.9090(5)   | 0.9434(2)   | 0.3781(2)   | 0.0273(8)      | 1         |
| C23  | 0.8225(5)   | 0.9435(3)   | 0.4540(2)   | 0.0307(8)      | 1         |
| C24  | 0.7244(5)   | 1.0111(3)   | 0.4832(2)   | 0.0338(9)      | 1         |
| C25  | 0.7137(5)   | 1.0742(3)   | 0.4364(2)   | 0.0335(8)      | 1         |
| C26  | 0.8023(5)   | 1.0716(3)   | 0.3624(2)   | 0.0297(8)      | 1         |
| C27  | 0.8084(5)   | 1.1375(2)   | 0.3121(2)   | 0.0299(8)      | 1         |
| C29  | 0.9124(5)   | 1.1998(2)   | 0.2009(2)   | 0.0299(8)      | 1         |
| C30  | 0.9526(6)   | 1.2837(3)   | 0.2455(3)   | 0.0444(10)     | 1         |
| C31  | 0.9619(8)   | 1.3500(3)   | 0.2001(4)   | 0.0580(13)     | 1         |
| C32  | 0.9351(7)   | 1.3328(3)   | 0.1132(4)   | 0.0544(13)     | 1         |
| C33  | 0.8963(6)   | 1.2492(3)   | 0.0691(3)   | 0.0423(10)     | 1         |
| C34  | 0.8854(5)   | 1.1816(3)   | 0.1125(3)   | 0.0344(9)      | 1         |
| C35  | 1.1277(5)   | 1.0440(3)   | 0.1246(3)   | 0.0364(9)      | 1         |
| C100 | 1.0162(5)   | 0.6820(3)   | 0.3567(3)   | 0.0391(9)      | 1         |
| C101 | 1.1883(7)   | 0.7120(5)   | 0.4063(3)   | 0.0656(15)     | 1         |
| C102 | 0.9732(8)   | 0.5880(3)   | 0.3180(4)   | 0.0597(13)     | 1         |
| C200 | 0.7674(8)   | 0.6397(5)   | 0.5249(4)   | 0.0740(18)     | 1         |
| C201 | 0.6022(9)   | 0.6670(6)   | 0.4963(6)   | 0.107(3)       | 1         |
| C202 | 0.7641(13)  | 0.5499(7)   | 0.5341(7)   | 0.131(4)       | 1         |
| C300 | 0.4902(10)  | 0.3734(6)   | 0.2514(5)   | 0.093(2)       | 1         |
| C301 | 0.4610(14)  | 0.4464(6)   | 0.2101(6)   | 0.117(3)       | 1         |
| C302 | 0.4465(10)  | 0.2855(5)   | 0.1952(6)   | 0.097(2)       | 1         |
| N1   | 1.1115(4)   | 0.89448(19) | 0.20618(18) | 0.0250(6)      | 1         |
| N4   | 0.8050(4)   | 0.9425(2)   | 0.14865(19) | 0.0268(6)      | 1         |
| N11  | 0.7273(4)   | 0.5566(2)   | 0.0439(2)   | 0.0354(7)      | 1         |
| N21  | 0.8985(4)   | 1.0059(2)   | 0.33386(18) | 0.0260(6)      | 1         |
| N23  | 0.8349(5)   | 0.8776(2)   | 0.4957(2)   | 0.0382(8)      | 1         |
| N28  | 0.8996(4)   | 1.1292(2)   | 0.24563(19) | 0.0280(7)      | 1         |
| O10  | 0.4769(4)   | 0.61258(18) | 0.0048(2)   | 0.0412(7)      | 1         |
| O12  | 1.0021(4)   | 0.54371(18) | 0.10187(19) | 0.0402(7)      | 1         |
| O17  | 1.5908(4)   | 0.66924(19) | 0.2565(2)   | 0.0425(7)      | 1         |
| O35  | 1.1887(5)   | 1.0651(2)   | 0.0663(2)   | 0.0584(10)     | 1         |
| O100 | 0.9119(4)   | 0.7331(2)   | 0.3491(2)   | 0.0466(7)      | 1         |
| O200 | 0.9018(6)   | 0.6908(4)   | 0.5387(3)   | 0.0906(15)     | 1         |
| O300 | 0.5472(12)  | 0.3858(7)   | 0.3235(4)   | 0.175(4)       | 1         |
| F6   | 0.3789(3)   | 0.93192(16) | 0.04606(16) | 0.0457(6)      | 1         |
| Cl1  | 1.28290(12) | 1.09337(6)  | 0.30739(6)  | 0.0342(2)      | 1         |
| Ru1  | 1.02562(4)  | 1.01860(2)  | 0.21998(2)  | 0.02367(10)    | 1         |

**Table S3.** Bond lengths [Å] and angles [°] for **FL389**.

|           |          |            |           |
|-----------|----------|------------|-----------|
| C2-N1     | 1.339(5) | C29-N28    | 1.443(4)  |
| C2-C3     | 1.403(5) | C30-C31    | 1.391(6)  |
| C2-C14    | 1.417(5) | C30-H30    | 0.9500    |
| C3-N4     | 1.370(5) | C31-C32    | 1.362(8)  |
| C3-C8     | 1.412(5) | C31-H31    | 0.9500    |
| C5-N4     | 1.336(5) | C32-C33    | 1.362(7)  |
| C5-C6     | 1.388(5) | C32-H32    | 0.9500    |
| C5-H5     | 0.9500   | C33-C34    | 1.388(5)  |
| C6-C7     | 1.346(6) | C33-H33    | 0.9500    |
| C6-F6     | 1.354(4) | C34-H34    | 0.9500    |
| C7-C8     | 1.413(5) | C35-O35    | 1.155(5)  |
| C7-H7     | 0.9500   | C35-Ru1    | 1.841(4)  |
| C8-C9     | 1.420(5) | C100-O100  | 1.218(5)  |
| C9-C13    | 1.386(5) | C100-C101  | 1.486(7)  |
| C9-C10    | 1.462(5) | C100-C102  | 1.487(7)  |
| C10-O10   | 1.219(5) | C101-H10A  | 0.9800    |
| C10-N11   | 1.389(5) | C101-H10B  | 0.9800    |
| C12-O12   | 1.211(5) | C101-H10C  | 0.9800    |
| C12-N11   | 1.384(5) | C102-H10D  | 0.9800    |
| C12-C13   | 1.489(5) | C102-H10E  | 0.9800    |
| C13-C14   | 1.405(5) | C102-H10F  | 0.9800    |
| C14-C15   | 1.437(5) | C200-O200  | 1.220(8)  |
| C15-C16   | 1.406(5) | C200-C202  | 1.459(11) |
| C15-C20   | 1.422(5) | C200-C201  | 1.465(9)  |
| C16-C17   | 1.378(5) | C201-H20A  | 0.9800    |
| C16-H16   | 0.9500   | C201-H20B  | 0.9800    |
| C17-O17   | 1.374(5) | C201-H20C  | 0.9800    |
| C17-C18   | 1.407(6) | C202-H20D  | 0.9800    |
| C18-C19   | 1.382(6) | C202-H20E  | 0.9800    |
| C18-H18   | 0.9500   | C202-H20F  | 0.9800    |
| C19-C20   | 1.402(5) | C300-O300  | 1.184(9)  |
| C19-H19   | 0.9500   | C300-C301  | 1.476(12) |
| C20-N1    | 1.399(5) | C300-C302  | 1.492(11) |
| C22-N21   | 1.337(4) | C301-H30A  | 0.9800    |
| C22-C23   | 1.408(5) | C301-H30B  | 0.9800    |
| C22-H22   | 0.9500   | C301-H30C  | 0.9800    |
| C23-N23   | 1.358(5) | C302-H30D  | 0.9800    |
| C23-C24   | 1.391(6) | C302-H30E  | 0.9800    |
| C24-C25   | 1.375(5) | C302-H30F  | 0.9800    |
| C24-H24   | 0.9500   | N1-Ru1     | 2.116(3)  |
| C25-C26   | 1.386(5) | N4-Ru1     | 2.105(3)  |
| C25-H25   | 0.9500   | N11-H11    | 0.8800    |
| C26-N21   | 1.357(5) | N21-Ru1    | 2.138(3)  |
| C26-C27   | 1.442(5) | N23-H23A   | 0.8020    |
| C27-N28   | 1.291(5) | N23-H23B   | 0.8879    |
| C27-H27   | 0.9500   | N28-Ru1    | 2.071(3)  |
| C29-C30   | 1.371(6) | O17-H17    | 0.8400    |
| C29-C34   | 1.385(5) | Cl1-Ru1    | 2.4102(9) |
| N1-C2-C3  | 122.7(3) | C7-C6-C5   | 124.6(3)  |
| N1-C2-C14 | 114.2(3) | F6-C6-C5   | 116.0(3)  |
| C3-C2-C14 | 123.0(3) | C6-C7-C8   | 116.7(3)  |
| N4-C3-C2  | 115.8(3) | C6-C7-H7   | 121.6     |
| N4-C3-C8  | 123.8(3) | C8-C7-H7   | 121.6     |
| C2-C3-C8  | 120.4(3) | C3-C8-C7   | 117.2(3)  |
| N4-C5-C6  | 120.1(4) | C3-C8-C9   | 116.3(3)  |
| N4-C5-H5  | 120.0    | C7-C8-C9   | 126.5(3)  |
| C6-C5-H5  | 120.0    | C13-C9-C8  | 122.7(3)  |
| C7-C6-F6  | 119.4(3) | C13-C9-C10 | 108.3(3)  |

|             |          |                |           |
|-------------|----------|----------------|-----------|
| C8-C9-C10   | 128.9(3) | C32-C33-C34    | 120.2(4)  |
| O10-C10-N11 | 124.9(4) | C32-C33-H33    | 119.9     |
| O10-C10-C9  | 128.8(4) | C34-C33-H33    | 119.9     |
| N11-C10-C9  | 106.3(3) | C29-C34-C33    | 119.5(4)  |
| O12-C12-N11 | 125.5(4) | C29-C34-H34    | 120.2     |
| O12-C12-C13 | 129.0(3) | C33-C34-H34    | 120.2     |
| N11-C12-C13 | 105.5(3) | O35-C35-Ru1    | 175.7(4)  |
| C9-C13-C14  | 121.7(3) | O100-C100-C101 | 120.7(5)  |
| C9-C13-C12  | 107.8(3) | O100-C100-C102 | 120.9(4)  |
| C14-C13-C12 | 130.5(3) | C101-C100-C102 | 118.5(5)  |
| C13-C14-C2  | 115.8(3) | C100-C101-H10A | 109.5     |
| C13-C14-C15 | 140.2(3) | C100-C101-H10B | 109.5     |
| C2-C14-C15  | 104.0(3) | H10A-C101-H10B | 109.5     |
| C16-C15-C20 | 120.9(3) | C100-C101-H10C | 109.5     |
| C16-C15-C14 | 133.1(3) | H10A-C101-H10C | 109.5     |
| C20-C15-C14 | 106.1(3) | H10B-C101-H10C | 109.5     |
| C17-C16-C15 | 118.0(4) | C100-C102-H10D | 109.5     |
| C17-C16-H16 | 121.0    | C100-C102-H10E | 109.5     |
| C15-C16-H16 | 121.0    | H10D-C102-H10E | 109.5     |
| O17-C17-C16 | 117.6(4) | C100-C102-H10F | 109.5     |
| O17-C17-C18 | 121.4(3) | H10D-C102-H10F | 109.5     |
| C16-C17-C18 | 121.0(4) | H10E-C102-H10F | 109.5     |
| C19-C18-C17 | 122.0(3) | O200-C200-C202 | 122.3(7)  |
| C19-C18-H18 | 119.0    | O200-C200-C201 | 120.3(7)  |
| C17-C18-H18 | 119.0    | C202-C200-C201 | 117.4(7)  |
| C18-C19-C20 | 117.8(4) | C200-C201-H20A | 109.5     |
| C18-C19-H19 | 121.1    | C200-C201-H20B | 109.5     |
| C20-C19-H19 | 121.1    | H20A-C201-H20B | 109.5     |
| N1-C20-C19  | 129.1(3) | C200-C201-H20C | 109.5     |
| N1-C20-C15  | 110.7(3) | H20A-C201-H20C | 109.5     |
| C19-C20-C15 | 120.3(3) | H20B-C201-H20C | 109.5     |
| N21-C22-C23 | 121.9(4) | C200-C202-H20D | 109.5     |
| N21-C22-H22 | 119.1    | C200-C202-H20E | 109.5     |
| C23-C22-H22 | 119.1    | H20D-C202-H20E | 109.5     |
| N23-C23-C24 | 122.0(4) | C200-C202-H20F | 109.5     |
| N23-C23-C22 | 119.5(4) | H20D-C202-H20F | 109.5     |
| C24-C23-C22 | 118.5(3) | H20E-C202-H20F | 109.5     |
| C25-C24-C23 | 118.8(3) | O300-C300-C301 | 121.1(10) |
| C25-C24-H24 | 120.6    | O300-C300-C302 | 123.8(10) |
| C23-C24-H24 | 120.6    | C301-C300-C302 | 115.1(7)  |
| C24-C25-C26 | 120.5(4) | C300-C301-H30A | 109.5     |
| C24-C25-H25 | 119.7    | C300-C301-H30B | 109.5     |
| C26-C25-H25 | 119.7    | H30A-C301-H30B | 109.5     |
| N21-C26-C25 | 120.8(3) | C300-C301-H30C | 109.5     |
| N21-C26-C27 | 114.5(3) | H30A-C301-H30C | 109.5     |
| C25-C26-C27 | 124.6(4) | H30B-C301-H30C | 109.5     |
| N28-C27-C26 | 119.1(4) | C300-C302-H30D | 109.5     |
| N28-C27-H27 | 120.5    | C300-C302-H30E | 109.5     |
| C26-C27-H27 | 120.5    | H30D-C302-H30E | 109.5     |
| C30-C29-C34 | 120.5(4) | C300-C302-H30F | 109.5     |
| C30-C29-N28 | 120.2(3) | H30D-C302-H30F | 109.5     |
| C34-C29-N28 | 119.3(3) | H30E-C302-H30F | 109.5     |
| C29-C30-C31 | 118.5(4) | C2-N1-C20      | 105.1(3)  |
| C29-C30-H30 | 120.7    | C2-N1-Ru1      | 109.1(2)  |
| C31-C30-H30 | 120.7    | C20-N1-Ru1     | 145.8(2)  |
| C32-C31-C30 | 121.4(5) | C5-N4-C3       | 117.6(3)  |
| C32-C31-H31 | 119.3    | C5-N4-Ru1      | 130.5(3)  |
| C30-C31-H31 | 119.3    | C3-N4-Ru1      | 111.9(2)  |
| C31-C32-C33 | 119.8(4) | C12-N11-C10    | 112.1(3)  |
| C31-C32-H32 | 120.1    | C12-N11-H11    | 124.0     |
| C33-C32-H32 | 120.1    | C10-N11-H11    | 124.0     |

|               |           |             |            |
|---------------|-----------|-------------|------------|
| C22-N21-C26   | 119.5(3)  | C35-Ru1-N1  | 95.05(15)  |
| C22-N21-Ru1   | 127.2(3)  | N28-Ru1-N1  | 168.31(11) |
| C26-N21-Ru1   | 113.3(2)  | N4-Ru1-N1   | 80.42(11)  |
| C23-N23-H23A  | 119.1     | C35-Ru1-N21 | 172.58(15) |
| C23-N23-H23B  | 116.0     | N28-Ru1-N21 | 77.43(12)  |
| H23A-N23-H23B | 124.9     | N4-Ru1-N21  | 88.25(11)  |
| C27-N28-C29   | 117.1(3)  | N1-Ru1-N21  | 92.34(11)  |
| C27-N28-Ru1   | 115.7(2)  | C35-Ru1-Cl1 | 89.47(13)  |
| C29-N28-Ru1   | 127.1(2)  | N28-Ru1-Cl1 | 90.89(9)   |
| C17-O17-H17   | 109.5     | N4-Ru1-Cl1  | 174.35(8)  |
| C35-Ru1-N28   | 95.29(15) | N1-Ru1-Cl1  | 94.65(8)   |
| C35-Ru1-N4    | 93.70(15) | N21-Ru1-Cl1 | 89.21(8)   |
| N28-Ru1-N4    | 93.47(12) |             |            |

---

**Table S4.** Anisotropic displacement parameters ( $\text{\AA}^2$ ) for **FL389**.The anisotropic displacement factor exponent takes the form:  $-2\pi^2[h^2a^{*2}U^{11} + \dots + 2hka^*b^*U^{12}]$ 

|      | $U^{11}$    | $U^{22}$    | $U^{33}$    | $U^{23}$    | $U^{13}$    | $U^{12}$     |
|------|-------------|-------------|-------------|-------------|-------------|--------------|
| C2   | 0.0272(19)  | 0.0242(19)  | 0.0271(18)  | 0.0050(15)  | -0.0007(14) | -0.0006(15)  |
| C3   | 0.0296(19)  | 0.0217(18)  | 0.0271(18)  | 0.0071(15)  | 0.0013(14)  | 0.0007(15)   |
| C5   | 0.031(2)    | 0.030(2)    | 0.0314(19)  | 0.0076(16)  | 0.0012(15)  | 0.0068(16)   |
| C6   | 0.0236(18)  | 0.034(2)    | 0.035(2)    | 0.0059(17)  | -0.0018(15) | 0.0076(15)   |
| C7   | 0.0251(18)  | 0.031(2)    | 0.0309(19)  | 0.0040(16)  | -0.0038(14) | 0.0005(15)   |
| C8   | 0.0250(18)  | 0.0262(19)  | 0.0276(18)  | 0.0033(15)  | -0.0001(14) | 0.0003(15)   |
| C9   | 0.0270(19)  | 0.0263(19)  | 0.0300(19)  | 0.0037(15)  | -0.0025(14) | 0.0011(15)   |
| C10  | 0.034(2)    | 0.026(2)    | 0.036(2)    | 0.0023(16)  | -0.0050(16) | -0.0017(16)  |
| C12  | 0.033(2)    | 0.0245(19)  | 0.0311(19)  | 0.0045(16)  | -0.0026(15) | 0.0012(16)   |
| C13  | 0.0283(19)  | 0.0226(19)  | 0.0297(18)  | 0.0032(15)  | 0.0001(14)  | 0.0013(15)   |
| C14  | 0.0250(18)  | 0.0226(18)  | 0.0261(17)  | 0.0025(14)  | -0.0010(14) | 0.0021(14)   |
| C15  | 0.0238(18)  | 0.0236(18)  | 0.0270(18)  | 0.0060(15)  | -0.0013(14) | -0.0002(14)  |
| C16  | 0.0250(18)  | 0.0250(19)  | 0.036(2)    | 0.0049(16)  | -0.0020(15) | 0.0005(15)   |
| C17  | 0.0264(19)  | 0.031(2)    | 0.038(2)    | 0.0085(17)  | -0.0019(15) | 0.0021(16)   |
| C18  | 0.0244(19)  | 0.036(2)    | 0.037(2)    | 0.0056(17)  | -0.0060(15) | -0.0046(16)  |
| C19  | 0.0255(18)  | 0.027(2)    | 0.0322(19)  | 0.0026(16)  | -0.0034(14) | -0.0022(15)  |
| C20  | 0.0275(18)  | 0.0236(18)  | 0.0254(17)  | 0.0043(15)  | 0.0007(14)  | 0.0011(15)   |
| C22  | 0.0304(19)  | 0.0266(19)  | 0.0244(18)  | 0.0080(15)  | -0.0019(14) | -0.0023(15)  |
| C23  | 0.0290(19)  | 0.030(2)    | 0.0297(19)  | 0.0064(16)  | -0.0042(15) | -0.0079(16)  |
| C24  | 0.028(2)    | 0.042(2)    | 0.0281(19)  | 0.0048(17)  | 0.0034(15)  | -0.0027(17)  |
| C25  | 0.0283(19)  | 0.039(2)    | 0.0313(19)  | 0.0038(17)  | 0.0012(15)  | 0.0034(17)   |
| C26  | 0.0273(19)  | 0.029(2)    | 0.0312(19)  | 0.0036(16)  | -0.0025(15) | 0.0024(15)   |
| C27  | 0.0310(19)  | 0.0260(19)  | 0.0314(19)  | 0.0042(16)  | -0.0009(15) | 0.0032(15)   |
| C29  | 0.034(2)    | 0.0237(19)  | 0.0326(19)  | 0.0075(16)  | 0.0033(15)  | 0.0035(15)   |
| C30  | 0.055(3)    | 0.027(2)    | 0.050(3)    | 0.0053(19)  | 0.006(2)    | 0.0029(19)   |
| C31  | 0.079(4)    | 0.022(2)    | 0.074(4)    | 0.010(2)    | 0.016(3)    | 0.006(2)     |
| C32  | 0.065(3)    | 0.036(3)    | 0.072(3)    | 0.029(3)    | 0.013(3)    | 0.012(2)     |
| C33  | 0.044(2)    | 0.046(3)    | 0.045(2)    | 0.024(2)    | 0.0071(19)  | 0.013(2)     |
| C34  | 0.032(2)    | 0.030(2)    | 0.041(2)    | 0.0100(18)  | 0.0012(16)  | 0.0035(16)   |
| C35  | 0.041(2)    | 0.025(2)    | 0.043(2)    | 0.0027(18)  | 0.0045(18)  | 0.0093(17)   |
| C100 | 0.037(2)    | 0.045(3)    | 0.036(2)    | 0.0077(19)  | 0.0042(17)  | 0.007(2)     |
| C101 | 0.042(3)    | 0.098(5)    | 0.054(3)    | 0.011(3)    | -0.002(2)   | 0.009(3)     |
| C102 | 0.076(4)    | 0.039(3)    | 0.065(3)    | 0.007(2)    | 0.006(3)    | 0.016(3)     |
| C200 | 0.060(4)    | 0.112(5)    | 0.057(3)    | 0.034(4)    | 0.010(3)    | 0.009(4)     |
| C201 | 0.059(4)    | 0.126(7)    | 0.156(8)    | 0.085(6)    | 0.003(4)    | 0.004(4)     |
| C202 | 0.129(8)    | 0.141(9)    | 0.163(9)    | 0.094(8)    | 0.060(7)    | 0.056(7)     |
| C300 | 0.089(5)    | 0.123(7)    | 0.068(4)    | 0.026(4)    | 0.030(4)    | -0.007(4)    |
| C301 | 0.153(8)    | 0.084(6)    | 0.101(6)    | 0.007(5)    | 0.022(6)    | -0.023(5)    |
| C302 | 0.087(5)    | 0.080(5)    | 0.130(7)    | 0.033(5)    | 0.028(5)    | 0.014(4)     |
| N1   | 0.0248(15)  | 0.0224(16)  | 0.0260(15)  | 0.0034(12)  | 0.0007(11)  | -0.0010(12)  |
| N4   | 0.0295(16)  | 0.0249(16)  | 0.0271(15)  | 0.0066(13)  | 0.0030(12)  | 0.0057(13)   |
| N11  | 0.0328(18)  | 0.0197(16)  | 0.0480(19)  | -0.0005(14) | -0.0072(14) | -0.0034(13)  |
| N21  | 0.0224(15)  | 0.0246(16)  | 0.0276(15)  | 0.0017(13)  | -0.0014(12) | -0.0035(12)  |
| N23  | 0.047(2)    | 0.0354(19)  | 0.0321(17)  | 0.0107(15)  | 0.0040(14)  | -0.0031(15)  |
| N28  | 0.0310(16)  | 0.0229(16)  | 0.0278(16)  | 0.0032(13)  | -0.0020(13) | -0.0006(13)  |
| O10  | 0.0329(16)  | 0.0285(15)  | 0.0564(18)  | 0.0018(13)  | -0.0125(13) | -0.0027(12)  |
| O12  | 0.0411(16)  | 0.0235(14)  | 0.0526(17)  | 0.0039(13)  | -0.0132(13) | 0.0034(12)   |
| O17  | 0.0307(15)  | 0.0361(16)  | 0.0591(19)  | 0.0086(14)  | -0.0123(13) | 0.0066(12)   |
| O35  | 0.079(2)    | 0.059(2)    | 0.056(2)    | 0.0341(18)  | 0.0395(18)  | 0.0349(19)   |
| O100 | 0.0412(17)  | 0.0410(18)  | 0.0551(19)  | 0.0056(15)  | -0.0040(14) | 0.0063(14)   |
| O200 | 0.062(3)    | 0.142(5)    | 0.071(3)    | 0.035(3)    | 0.004(2)    | 0.004(3)     |
| O300 | 0.185(8)    | 0.263(11)   | 0.072(4)    | 0.034(5)    | 0.015(4)    | -0.003(7)    |
| F6   | 0.0336(13)  | 0.0417(14)  | 0.0595(15)  | 0.0037(12)  | -0.0123(11) | 0.0142(11)   |
| Cl1  | 0.0325(5)   | 0.0293(5)   | 0.0362(5)   | 0.0018(4)   | -0.0014(4)  | -0.0062(4)   |
| Ru1  | 0.02657(16) | 0.01878(15) | 0.02449(15) | 0.00348(11) | 0.00129(10) | -0.00018(10) |

**Table S5.** Hydrogen coordinates and isotropic displacement parameters ( $\text{\AA}^2$ ) for **FL389**.

|      | x      | y      | z      | U(eq) | Occupancy |
|------|--------|--------|--------|-------|-----------|
| H5   | 0.6332 | 1.0245 | 0.1333 | 0.036 | 1         |
| H7   | 0.4486 | 0.7765 | 0.0224 | 0.036 | 1         |
| H16  | 1.2909 | 0.6376 | 0.1754 | 0.035 | 1         |
| H18  | 1.6313 | 0.8368 | 0.3134 | 0.040 | 1         |
| H19  | 1.4403 | 0.9377 | 0.2960 | 0.035 | 1         |
| H22  | 0.9767 | 0.8977 | 0.3578 | 0.033 | 1         |
| H24  | 0.6659 | 1.0135 | 0.5346 | 0.041 | 1         |
| H25  | 0.6450 | 1.1201 | 0.4548 | 0.040 | 1         |
| H27  | 0.7462 | 1.1864 | 0.3276 | 0.036 | 1         |
| H30  | 0.9737 | 1.2964 | 0.3060 | 0.053 | 1         |
| H31  | 0.9875 | 1.4085 | 0.2304 | 0.070 | 1         |
| H32  | 0.9435 | 1.3790 | 0.0834 | 0.065 | 1         |
| H33  | 0.8766 | 1.2372 | 0.0086 | 0.051 | 1         |
| H34  | 0.8595 | 1.1233 | 0.0818 | 0.041 | 1         |
| H10A | 1.2143 | 0.7750 | 0.4131 | 0.098 | 1         |
| H10B | 1.2810 | 0.6835 | 0.3756 | 0.098 | 1         |
| H10C | 1.1830 | 0.6973 | 0.4628 | 0.098 | 1         |
| H10D | 0.9957 | 0.5540 | 0.3612 | 0.090 | 1         |
| H10E | 1.0467 | 0.5721 | 0.2700 | 0.090 | 1         |
| H10F | 0.8488 | 0.5759 | 0.2973 | 0.090 | 1         |
| H20A | 0.6276 | 0.7202 | 0.4745 | 0.160 | 1         |
| H20B | 0.5276 | 0.6780 | 0.5446 | 0.160 | 1         |
| H20C | 0.5410 | 0.6211 | 0.4507 | 0.160 | 1         |
| H20D | 0.7276 | 0.5109 | 0.4788 | 0.196 | 1         |
| H20E | 0.6806 | 0.5387 | 0.5763 | 0.196 | 1         |
| H20F | 0.8818 | 0.5399 | 0.5534 | 0.196 | 1         |
| H30A | 0.4923 | 0.5013 | 0.2516 | 0.175 | 1         |
| H30B | 0.3368 | 0.4412 | 0.1900 | 0.175 | 1         |
| H30C | 0.5345 | 0.4451 | 0.1614 | 0.175 | 1         |
| H30D | 0.4396 | 0.2416 | 0.2304 | 0.145 | 1         |
| H30E | 0.5382 | 0.2747 | 0.1549 | 0.145 | 1         |
| H30F | 0.3330 | 0.2824 | 0.1632 | 0.145 | 1         |
| H11  | 0.6904 | 0.5012 | 0.0249 | 0.042 | 1         |
| H23A | 0.8804 | 0.8364 | 0.4734 | 0.046 | 1         |
| H23B | 0.7923 | 0.8846 | 0.5470 | 0.046 | 1         |
| H17  | 1.6827 | 0.6951 | 0.2852 | 0.064 | 1         |

**Table S6.** Torsion angles [°] for **FL389**.

|                 |           |                 |           |
|-----------------|-----------|-----------------|-----------|
| N1-C2-C3-N4     | -0.9(5)   | C24-C25-C26-N21 | 1.2(6)    |
| C14-C2-C3-N4    | 179.7(3)  | C24-C25-C26-C27 | -175.8(3) |
| N1-C2-C3-C8     | -179.7(3) | N21-C26-C27-N28 | 0.7(5)    |
| C14-C2-C3-C8    | 0.9(5)    | C25-C26-C27-N28 | 178.0(4)  |
| N4-C5-C6-C7     | 1.6(6)    | C34-C29-C30-C31 | 1.3(7)    |
| N4-C5-C6-F6     | -178.0(3) | N28-C29-C30-C31 | -179.3(4) |
| F6-C6-C7-C8     | 179.1(3)  | C29-C30-C31-C32 | -1.2(8)   |
| C5-C6-C7-C8     | -0.5(6)   | C30-C31-C32-C33 | 0.8(8)    |
| N4-C3-C8-C7     | 1.2(5)    | C31-C32-C33-C34 | -0.5(7)   |
| C2-C3-C8-C7     | 179.9(3)  | C30-C29-C34-C33 | -1.1(6)   |
| N4-C3-C8-C9     | -177.6(3) | N28-C29-C34-C33 | 179.6(4)  |
| C2-C3-C8-C9     | 1.1(5)    | C32-C33-C34-C29 | 0.7(6)    |
| C6-C7-C8-C3     | -0.8(5)   | C3-C2-N1-C20    | -179.6(3) |
| C6-C7-C8-C9     | 177.8(4)  | C14-C2-N1-C20   | -0.1(4)   |
| C3-C8-C9-C13    | -1.7(5)   | C3-C2-N1-Ru1    | 0.8(4)    |
| C7-C8-C9-C13    | 179.6(3)  | C14-C2-N1-Ru1   | -179.6(2) |
| C3-C8-C9-C10    | 174.3(4)  | C19-C20-N1-C2   | -178.6(4) |
| C7-C8-C9-C10    | -4.4(6)   | C15-C20-N1-C2   | 0.7(4)    |
| C13-C9-C10-O10  | 177.2(4)  | C19-C20-N1-Ru1  | 0.7(7)    |
| C8-C9-C10-O10   | 0.8(7)    | C15-C20-N1-Ru1  | 179.9(3)  |
| C13-C9-C10-N11  | -1.5(4)   | C6-C5-N4-C3     | -1.2(5)   |
| C8-C9-C10-N11   | -178.0(4) | C6-C5-N4-Ru1    | 179.7(3)  |
| C8-C9-C13-C14   | 0.2(6)    | C2-C3-N4-C5     | -179.0(3) |
| C10-C9-C13-C14  | -176.5(3) | C8-C3-N4-C5     | -0.2(5)   |
| C8-C9-C13-C12   | 177.8(3)  | C2-C3-N4-Ru1    | 0.4(4)    |
| C10-C9-C13-C12  | 1.1(4)    | C8-C3-N4-Ru1    | 179.1(3)  |
| O12-C12-C13-C9  | -179.4(4) | O12-C12-N11-C10 | 178.4(4)  |
| N11-C12-C13-C9  | -0.3(4)   | C13-C12-N11-C10 | -0.7(4)   |
| O12-C12-C13-C14 | -2.0(7)   | O10-C10-N11-C12 | -177.4(4) |
| N11-C12-C13-C14 | 177.1(4)  | C9-C10-N11-C12  | 1.4(4)    |
| C9-C13-C14-C2   | 1.7(5)    | C23-C22-N21-C26 | 0.1(5)    |
| C12-C13-C14-C2  | -175.3(4) | C23-C22-N21-Ru1 | 178.2(3)  |
| C9-C13-C14-C15  | 179.8(4)  | C25-C26-N21-C22 | -0.6(5)   |
| C12-C13-C14-C15 | 2.8(8)    | C27-C26-N21-C22 | 176.8(3)  |
| N1-C2-C14-C13   | 178.2(3)  | C25-C26-N21-Ru1 | -178.9(3) |
| C3-C2-C14-C13   | -2.3(5)   | C27-C26-N21-Ru1 | -1.5(4)   |
| N1-C2-C14-C15   | -0.5(4)   | C26-C27-N28-C29 | -175.6(3) |
| C3-C2-C14-C15   | 179.0(3)  | C26-C27-N28-Ru1 | 0.5(4)    |
| C13-C14-C15-C16 | 2.5(8)    | C30-C29-N28-C27 | 47.4(5)   |
| C2-C14-C15-C16  | -179.3(4) | C34-C29-N28-C27 | -133.2(4) |
| C13-C14-C15-C20 | -177.3(4) | C30-C29-N28-Ru1 | -128.1(4) |
| C2-C14-C15-C20  | 0.9(4)    | C34-C29-N28-Ru1 | 51.2(5)   |
| C20-C15-C16-C17 | 1.5(5)    | O35-C35-Ru1-N28 | 12(5)     |
| C14-C15-C16-C17 | -178.3(4) | O35-C35-Ru1-N4  | 106(5)    |
| C15-C16-C17-O17 | 179.0(3)  | O35-C35-Ru1-N1  | -173(5)   |
| C15-C16-C17-C18 | -0.6(6)   | O35-C35-Ru1-N21 | 1(6)      |
| O17-C17-C18-C19 | -179.9(4) | O35-C35-Ru1-Cl1 | -79(5)    |
| C16-C17-C18-C19 | -0.3(6)   | C27-N28-Ru1-C35 | -179.5(3) |
| C17-C18-C19-C20 | 0.3(6)    | C29-N28-Ru1-C35 | -3.9(3)   |
| C18-C19-C20-N1  | 179.8(3)  | C27-N28-Ru1-N4  | 86.4(3)   |
| C18-C19-C20-C15 | 0.6(5)    | C29-N28-Ru1-N4  | -98.0(3)  |
| C16-C15-C20-N1  | 179.1(3)  | C27-N28-Ru1-N1  | 28.4(7)   |
| C14-C15-C20-N1  | -1.0(4)   | C29-N28-Ru1-N1  | -156.0(5) |
| C16-C15-C20-C19 | -1.5(5)   | C27-N28-Ru1-N21 | -1.0(3)   |
| C14-C15-C20-C19 | 178.3(3)  | C29-N28-Ru1-N21 | 174.6(3)  |
| N21-C22-C23-N23 | 178.8(3)  | C27-N28-Ru1-Cl1 | -90.0(3)  |
| N21-C22-C23-C24 | -0.3(5)   | C29-N28-Ru1-Cl1 | 85.6(3)   |
| N23-C23-C24-C25 | -178.2(3) | C5-N4-Ru1-C35   | -86.2(3)  |
| C22-C23-C24-C25 | 0.9(5)    | C3-N4-Ru1-C35   | 94.6(3)   |
| C23-C24-C25-C26 | -1.4(6)   | C5-N4-Ru1-N28   | 9.3(3)    |

|                 |            |
|-----------------|------------|
| C3-N4-Ru1-N28   | -169.9(2)  |
| C5-N4-Ru1-N1    | 179.3(3)   |
| C3-N4-Ru1-N1    | 0.0(2)     |
| C5-N4-Ru1-N21   | 86.6(3)    |
| C3-N4-Ru1-N21   | -92.6(2)   |
| C5-N4-Ru1-Cl1   | 149.8(8)   |
| C3-N4-Ru1-Cl1   | -29.4(11)  |
| C2-N1-Ru1-C35   | -93.4(3)   |
| C20-N1-Ru1-C35  | 87.4(4)    |
| C2-N1-Ru1-N28   | 58.7(7)    |
| C20-N1-Ru1-N28  | -120.5(6)  |
| C2-N1-Ru1-N4    | -0.4(2)    |
| C20-N1-Ru1-N4   | -179.7(4)  |
| C2-N1-Ru1-N21   | 87.4(2)    |
| C20-N1-Ru1-N21  | -91.8(4)   |
| C2-N1-Ru1-Cl1   | 176.8(2)   |
| C20-N1-Ru1-Cl1  | -2.4(4)    |
| C22-N21-Ru1-C35 | -165.4(11) |
| C26-N21-Ru1-C35 | 12.7(13)   |
| C22-N21-Ru1-N28 | -176.8(3)  |
| C26-N21-Ru1-N28 | 1.4(2)     |
| C22-N21-Ru1-N4  | 89.2(3)    |
| C26-N21-Ru1-N4  | -92.6(3)   |
| C22-N21-Ru1-N1  | 8.9(3)     |
| C26-N21-Ru1-N1  | -172.9(2)  |
| C22-N21-Ru1-Cl1 | -85.7(3)   |
| C26-N21-Ru1-Cl1 | 92.4(2)    |

---



**Table S7.** Hydrogen bonds for **FL389** [ $\text{\AA}$  and  $^\circ$ ].

| D-H...A          | d(D-H) | d(H...A) | d(D...A) | $\angle(\text{DHA})$ |
|------------------|--------|----------|----------|----------------------|
| N11-H11...O10#1  | 0.88   | 2.05     | 2.894(4) | 159.6                |
| O17-H17...O100#2 | 0.84   | 1.96     | 2.790(4) | 169.0                |
| N23-H23A...O100  | 0.80   | 2.34     | 3.054(5) | 148.1                |
| N23-H23B...C11#3 | 0.89   | 2.39     | 3.271(3) | 172.5                |

Symmetry transformations used to generate equivalent atoms:

#1  $-x+1, -y+1, -z$  #2  $x+1, y, z$  #3  $-x+2, -y+2, -z+1$

#### A.4.) Resolution of racemic mixtures and determination of absolute configurations

**Complex FL172.** The enantiomers were separated using a CHIRALPAK IB analytical HPLC column (Daicel/Chiral Technologies, 250 x 4.6 mm) using the solvent of ethanol : hexane (1:1) in 15 minutes with a flow rate of 0.75 ml/minute. The enantiomers were baseline separated under these conditions with retention times of 12.9 (E1) and 15.3 min (E2). The enantiomers do not show any racemization in an ethanol solution over a time period of 12 hours. The CD spectra of the separated enantiomers is shown below in Figure S11 and were recorded on a Model J-810 Spectropolarimeter. The slower eluting enantiomer E2 showed more potent PAK-1 inhibition and was cocrystallized with PAK1 (see part C) and based on this cocrystal structure assigned with the  $\Lambda$ -configuration (For the  $\Lambda/\Delta$ -nomenclature, see: *Inorg. Chem.* **1983**, 22, 1569-1573).

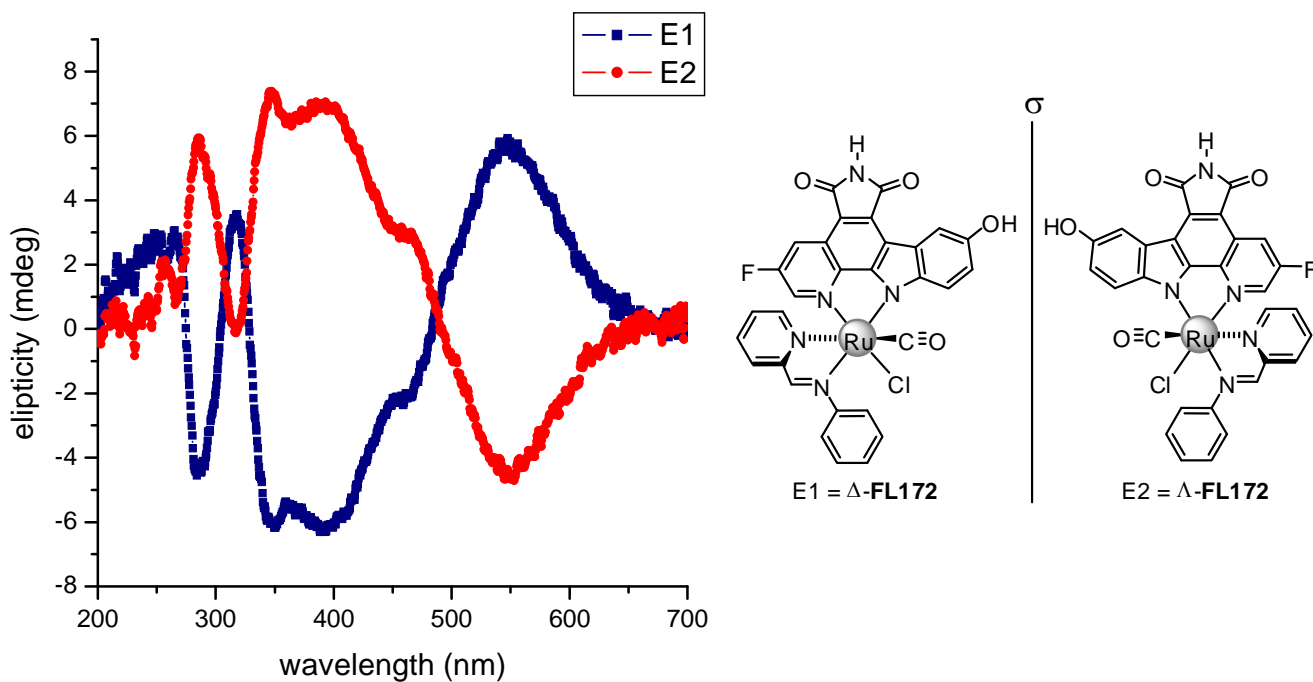

**Figure S11.** Circular dichroism spectra of the two enantiomers of FL172.

**Complex FL411:** For the resolution of the racemic mixture of **FL411**, the amino group at the 4-position of the pyridine was BOC-protected and removed after the separation with a CHIRALPAK IB analytical HPLC column (Daicel/Chiral Technologies, 250 x 4.6 mm) with the solvent of ethanol : hexane (2:3) in 15 minutes with a flow rate of 0.75 ml/minute. The enantiomers were baseline-separated under these conditions with retention times of ca. 10.5 (E1) and 15.7 min (E2). The enantiomers don't show any significant racemization in an ethanol solution over a time period of 12 hours. The CD spectra of the separated enantiomers after BOC-deprotection is shown below in Figure S12. Absolute configurations were assigned by correlation with the CD spectra of **FL172**.

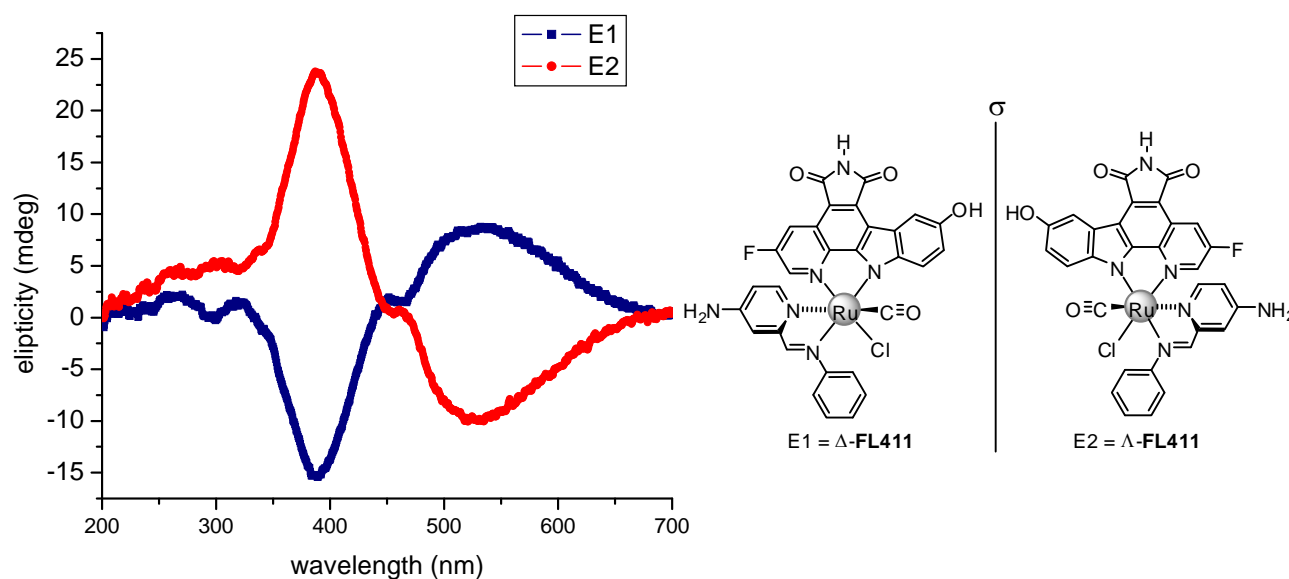

**Figure S12.** Circular dichroism spectra of the two enantiomers of **FL411**.

## **B.) Kinase Assays**

### **B.1.) Kinase assays with the protein kinases PAK1, Pim1, and GSK3**

**PAK1 kinase assay.** For in vitro kinase assays, the DNA encoding the kinase domain of PAK1 (residues from 249 to 545) was subcloned into the pFastBac HTc expression vector and protein was expressed in Sf21 cells. Cells were lysed by sonication in 50 mM HEPES pH 7.0, 500mM NaCl and 5 mM DTT (resuspension buffer). The lysate was cleared by centrifugation and applied to a Ni-NTA affinity column. The protein was eluted from the column with increasing concentration of imidazole in resuspension buffer (20 mM to 250 mM) and treated overnight with TEV protease to cleave the His<sub>6</sub>-tag. The protein was further purified by passage through Mono-Q and a size-exclusion Superdex 200 column equilibrated with 20 mM Tris pH 8.0, 125 mM NaCl. Purified protein was concentrated to 1.2 mg/ml and frozen for storage.

Kinase assays were performed using labeled  $\gamma$ -P<sup>32</sup> ATP and the incorporation of P<sup>32</sup>-phosphate into the myelin basic protein (MBP) substrate (Millipore) was monitored. Different concentrations of the inhibitor were incubated with 0.2 nM PAK1 kinase in 20 mM MOPS pH 7.0, 30 mM MgCl<sub>2</sub>, 0.8  $\mu$ g/ $\mu$ L bovine serum albumin and 5% DMSO (resulting from the inhibitor stock solution) in the presence of 25  $\mu$ g of MBP substrate for 15 minutes. Reactions were initiated by adding ATP to a final concentration of 1  $\mu$ M including 0.2  $\mu$ Ci/ $\mu$ L  $\gamma$ -<sup>32</sup>P ATP in a final volume of 25  $\mu$ L. The reactions were terminated by spotting 17.5  $\mu$ L onto circular P81 phosphocellulose paper (diameter 2.1 cm, Whatman), followed by washing three times with 0.75% phosphoric acid and one time with acetone. The dried P81 papers were transferred to scintillation vials and 4ml of scintillation cocktail was added. The counts per minute (CPM) were measured in a Packard 1500 Tri-Carb Liquid Scintillation Analyzer and the IC<sub>50</sub> values were defined to be the concentration of inhibitor at which the counts per minute (CPM) was 50% of the control sample, corrected for by the background CPM.

**Pim1 kinase assay.** Kinase assays were performed using labeled  $\gamma$ -P<sup>32</sup> ATP and the incorporation of P<sup>32</sup>-phosphate into the substrate (S6 kinase/Rsk2 substrate peptide 2) was monitored. Various concentrations of the inhibitor were incubated at room temperature in 20 mM MOPS pH 7.0, 30 mM MgCl<sub>2</sub>, 0.8  $\mu$ g/ $\mu$ l BSA, 5% DMSO (resulting from the inhibitor stock solution), in the presence of substrate (50  $\mu$ M) and Pim1 kinase (0.16 nM, except for testing **DW12** and **NP309** where 0.1 nM enzyme was used). After 15 min, the reaction was initiated by adding ATP to a final concentration of 1  $\mu$ M, including approximately 0.2  $\mu$ Ci/ $\mu$ l  $\gamma$ -P<sup>32</sup> ATP. Reactions were performed in a total volume of 25  $\mu$ L. The reaction was terminated by spotting 17.5  $\mu$ L on circular P81 phosphocellulose paper followed by washing four times for five minutes each with 0.75% phosphoric acid and once with acetone. The dried P81 papers were transferred to the scintillation vials, 4 ml of scintillation cocktail were added and the CPM determined with a Packard 1500 Tri-Carb Liquid Scintillation Analyzer. Pim1 kinase and S6 kinase/Rsk2 Substrate Peptide 2 were purchased from Millipore.

**GSK3 $\beta$  kinase assay.** The procedure was as described for the Pim1 kinase assay, but in the presence of substrate peptide, Phospho-Glycogen Synthase Peptide-2 (20  $\mu$ M), and GSK-3 $\beta$  (0.2 nM, except for determining IC<sub>50</sub> values of **DW12** and **NP309** where 0.1 nM enzyme was used). GSK3 $\beta$  and the substrate were purchased from Millipore.

**Determination of  $K_m$  values for ATP.** For determination of  $K_m$  values of ATP for Pim1, GSK3 $\beta$  and PAK1, the activity of each kinase was measured under a range of ATP concentrations. Kinase assays were performed as described above.  $K_m$  values were calculated using the Michaelis-Menten equation with the GraphPad Prism 5.0 software. All experiments were done in duplicate or triplicate.

|                       | Pim1       | GSK3 $\beta$  | PAK1          |
|-----------------------|------------|---------------|---------------|
| $K_m$ -ATP ( $\mu$ M) | 48 $\pm$ 6 | 9.3 $\pm$ 0.8 | 4.4 $\pm$ 0.3 |

## B.2.) Selectivity of FL172 in a panel of 264 protein kinases

| Kinase               | Activity (%) | Kinase                | Activity (%) | Kinase               | Activity (%) | Kinase             | Activity (%) |
|----------------------|--------------|-----------------------|--------------|----------------------|--------------|--------------------|--------------|
| Abl(h)               | 94           | CHK2(I157T)(h)        | 67           | EphB1(h)             | 112          | Itk(h)             | 73           |
| Abl(m)               | 77           | CHK2(R145W)(h)        | 55           | EphB3(h)             | 94           | JAK2(h)            | 117          |
| Abl (H396P) (h)      | 83           | CK1 $\gamma$ 1(h)     | 89           | EphB4(h)             | 124          | JAK3(h)            | 92           |
| Abl (M351T)(h)       | 92           | CK1 $\gamma$ 2(h)     | 85           | ErbB4(h)             | 93           | JNK1 $\alpha$ 1(h) | 107          |
| Abl (Q252H) (h)      | 80           | CK1 $\gamma$ 3(h)     | 50           | FAK(h)               | 83           | JNK2 $\alpha$ 2(h) | 100          |
| Abl(T315I)(h)        | 88           | CK1 $\delta$ (h)      | 88           | Fer(h)               | 80           | JNK3(h)            | 68           |
| Abl(Y253F)(h)        | 88           | CK1( $\gamma$ )       | 59           | Fes(h)               | 127          | KDR(h)             | 39           |
| ACK1(h)              | 91           | CK2(h)                | 109          | FGFR1(h)             | 96           | Lck(h)             | 61           |
| ALK(h)               | 117          | CK2 $\alpha$ 2(h)     | 109          | FGFR1 (V561M)(h)     | 49           | LIMK1(h)           | 95           |
| ALK4(h)              | 0            | CLK2(h)               | 20           | FGFR2(h)             | 108          | LKB1(h)            | 100          |
| Arg(h)               | 68           | CLK3(h)               | 80           | FGFR2 (N549H)(h)     | 84           | LOK(h)             | 90           |
| AMPK(r)              | 74           | cKit(h)               | 88           | FGFR3(h)             | 97           | Lyn(h)             | 14           |
| Arg(m)               | 88           | cKit(D816V)(h)        | 105          | FGFR4(h)             | 89           | Lyn(m)             | 12           |
| ARK5(h)              | 0            | cKit(D816H)(h)        | 66           | Fgr(h)               | 63           | MAPK1(h)           | 86           |
| ASK1(h)              | 0            | cKit(V560G)(h)        | 19           | Flt1(h)              | 75           | MAPK2(h)           | 103          |
| Aurora-A(h)          | 77           | cKit(V654A)(h)        | 94           | Flt3(D835Y)(h)       | 26           | MAPK2(m)           | 99           |
| Axl(h)               | 50           | CSK(h)                | 110          | Flt3(h)              | 33           | MAPKAP-K2(h)       | 100          |
| Blk(m)               | 54           | c-RAF(h)              | 44           | Flt4(h)              | 30           | MAPKAP-K3(h)       | 112          |
| Bmx(h)               | 147          | cSRC(h)               | 59           | Fms(h)               | 28           | MEK1(h)            | 106          |
| BRK(h)               | 115          | DAPK1(h)              | 104          | Fyn(h)               | 83           | MARK1(h)           | 86           |
| BrSK1(h)             | 95           | DAPK2(h)              | 90           | GCK(h)               | 99           | MELK(h)            | 23           |
| BrSK2(h)             | 101          | DCAMKL2(h)            | 80           | GRK5(h)              | 81           | Mer(h)             | 33           |
| BTK(h)               | 71           | DDR2(h)               | 84           | GRK6(h)              | 75           | Met(h)             | 57           |
| BTK(R28H)(h)         | 109          | DMPK(h)               | 107          | GRK7(h)              | 25           | MINK(h)            | 95           |
| CaMKI(h)             | 107          | DRAK1(h)              | 52           | GSK3 $\alpha$ (h)    | 2            | MKK4(m)            | 117          |
| CaMKII $\beta$ (h)   | 66           | DYRK2(h)              | 113          | GSK3 $\beta$ (h)     | 25           | MKK6(h)            | 109          |
| CaMKII $\gamma$ (h)  | 50           | eEF-2K(h)             | 112          | Haspin(h)            | 66           | MKK7 $\beta$ (h)   | 65           |
| CaMKI $\delta$ (h)   | 80           | EGFR(h)               | 94           | Hck(h)               | 30           | MLCK(h)            | 14           |
| CaMKII $\delta$ (h)  | 45           | EGFR(L858R)(h)        | 80           | HIPK1(h)             | 83           | MLK1(h)            | 33           |
| CaMKIV(h)            | 81           | EGFR(L861Q)(h)        | 94           | HIPK2(h)             | 64           | Mnk2(h)            | 99           |
| CDK1/cyclinB(h)      | 72           | EGFR(T790M)(h)        | 90           | HIPK3(h)             | 87           | MRCK $\alpha$ (h)  | 111          |
| CDK2/cyclinA(h)      | 78           | EGFR (T790M,L858R)(h) | 62           | IGF-1R(h)            | 78           | MRCK $\beta$ (h)   | 96           |
| CDK2/cyclinE(h)      | 54           | EphA1(h)              | 97           | IGF-1R(h), activated | 95           | MSK1(h)            | 48           |
| CDK3/cyclinE(h)      | 108          | EphA2(h)              | 96           | IKK $\alpha$ (h)     | 123          | MSK2(h)            | 61           |
| CDK5/p25(h)          | 81           | EphA3(h)              | 109          | IKK $\beta$ (h)      | 93           | MSSK1(h)           | 100          |
| CDK5/p35(h)          | 56           | EphA4(h)              | 111          | IR(h)                | 103          | MST1(h)            | 95           |
| CDK7/cyclinH/MAT1(h) | 114          | EphA5(h)              | 119          | IR(h), activated     | 105          | MST2(h)            | 65           |
| CDK9/cyclinT1(h)     | 96           | EphA7(h)              | 106          | IRR(h)               | 59           | MST3(h)            | 39           |
| CHK1(h)              | 74           | EphA8(h)              | 118          | IRAK1(h)             | 86           | mTOR(h)            | 87           |
| CHK2(h)              | 52           | EphB2(h)              | 135          | IRAK4(h)             | 97           | mTOR/FKBP12(h)     | 100          |

| Kinase                    | Activity (%) | Kinase                           | Activity (%) | Kinase           | Activity (%) | Kinase           | Activity (%) |
|---------------------------|--------------|----------------------------------|--------------|------------------|--------------|------------------|--------------|
| MuSK(h)                   | 81           | PKB $\alpha$ (h)                 | 20           | Ret(V804M)(h)    | 79           | SRPK2(h)         | 85           |
| NEK2(h)                   | 86           | PKB $\beta$ (h)                  | 54           | RIPK2(h)         | 95           | STK33(h)         | 50           |
| NEK3(h)                   | 85           | PKB $\gamma$ (h)                 | 27           | ROCK-I(h)        | 108          | Syk(h)           | 83           |
| NEK6(h)                   | 112          | PKC $\alpha$ (h)                 | 63           | ROCK-II(h)       | 83           | TAK1(h)          | 108          |
| NEK7(h)                   | 102          | PKC $\beta$ I(h)                 | 38           | ROCK-II(r)       | 85           | TAO1(h)          | 60           |
| NEK11(h)                  | 49           | PKC $\beta$ II(h)                | 25           | Ron(h)           | 98           | TAO2(h)          | 37           |
| NLK(h)                    | 98           | PKC $\gamma$ (h)                 | 33           | Ros(h)           | 90           | TAO3(h)          | 65           |
| p70S6K(h)                 | 76           | PKC $\delta$ (h)                 | 71           | Rse(h)           | 21           | TBK1(h)          | 81           |
| <b>PAK1(h)</b>            | <b>17</b>    | PKC $\epsilon$ (h)               | 65           | <b>Rsk1(h)</b>   | <b>13</b>    | Tec(h) activated | 94           |
| PAK2(h)                   | 26           | PKC $\eta$ (h)                   | 97           | Rsk1(r)          | 22           | Tie2(h)          | 67           |
| <b>PAK3(h)</b>            | <b>8</b>     | PKC $\theta$ (h)                 | 77           | Rsk2(h)          | 33           | Tie2(R849W)(h)   | 61           |
| PAK4(h)                   | 82           | PKC $\mu$ (h)                    | 102          | Rsk3(h)          | 33           | Tie2(Y897S)(h)   | 82           |
| PAK5(h)                   | 71           | <b>PKC<math>\theta</math>(h)</b> | <b>15</b>    | Rsk4(h)          | 20           | TLK2(h)          | 100          |
| PAK6(h)                   | 92           | PKC $\zeta$ (h)                  | 73           | SAPK2a(h)        | 103          | TrkA(h)          | 30           |
| PAR-1Ba(h)                | 42           | PKD2(h)                          | 98           | SAPK2a(T106M)(h) | 106          | <b>TrkB(h)</b>   | <b>7</b>     |
| PASK(h)                   | 109          | PKG1 $\alpha$ (h)                | 40           | SAPK2b(h)        | 96           | TSSK1(h)         | 74           |
| PDGFR $\alpha$ (h)        | 120          | PKG1 $\beta$ (h)                 | 36           | SAPK3(h)         | 112          | TSSK2(h)         | 104          |
| PDGFR $\alpha$ (D842V)(h) | 60           | Plk1(h)                          | 101          | SAPK4(h)         | 107          | Txk(h)           | 96           |
| PDGFR $\alpha$ (V561D)(h) | 51           | Plk3(h)                          | 108          | SGK(h)           | 84           | ULK2(h)          | 97           |
| PDGFR $\beta$ (h)         | 104          | PRAK(h)                          | 48           | SGK2(h)          | 104          | ULK3(h)          | 111          |
| PDK1(h)                   | 92           | PRK2(h)                          | 32           | SGK3(h)          | 98           | WNK2(h)          | 77           |
| PhK $\gamma$ 2(h)         | 93           | PrKX(h)                          | 76           | SIK(h)           | 59           | WNK3(h)          | 81           |
| <b>Pim-1(h)</b>           | <b>1</b>     | PTK5(h)                          | 68           | Snk(h)           | 99           | VRK2(h)          | 93           |
| <b>Pim-2(h)</b>           | <b>1</b>     | Pyk2(h)                          | 76           | Src(1-530)(h)    | 60           | Yes(h)           | 54           |
| Pim-3(h)                  | 24           | Ret(h)                           | 87           | Src(T341M)(h)    | 73           | ZAP-70(h)        | 126          |
| PKA(h)                    | 69           | Ret(V804L)(h)                    | 89           | SRPK1(h)         | 93           | ZIPK(h)          | 108          |

Measured by Millipore UK Ltd (Millipore Kinase Profiler<sup>TM</sup>). PAK1 was measured separately because it was not available in the Kinase Profiler panel. Conditions: 3  $\mu$ M **FL172** at an ATP concentration of 10  $\mu$ M. Measurements were performed in duplicate and the average taken. Kinases displaying less than 20% activity under these conditions are highlighted.

## **C.) PAK1 Crystallography**

### **C.1.) PAK1 expression and purification**

PAK1 kinase domain (residues 249 to 545, mutation Lys299Arg) was cloned into a pET-TOPO vector with an N-terminal 6-His tag and expressed in BL21(DE3) *E. coli* cells. The kinase domain contained the inactivating mutation Lys299Arg. Cells were grown at 37 °C until they reached an OD<sub>600</sub> of 0.6 and protein expression was induced by adding 1 mM IPTG for 6 hours at 28°C. Protein was purified from harvested cells as described above. Purified protein was concentrated to 9 mg/ml in a buffer containing 20 mM Tris pH 8.0, 125 mM NaCl, and used for crystallization.

### **C.2.) Crystallization and data collections**

Crystals of apo-PAK1 were obtained using hanging drop vapor diffusion by mixing 1 µL of PAK1 (9 mg/ml) with 1 µL of crystallization solution (0.1 M HEPES pH 7.5, 1 M NaCl, 25% PEG 10000, 10 mM DTT) at 4°C. Crystals were subjected to soaking with 1 mM (*R*)-**DW12** inhibitor overnight. Crystals were cryoprotected, flash frozen in liquid nitrogen and yielded X-ray diffraction to 2.35 Å at the APS 23 ID-B beam line.

For structure determination of PAK1 in complex with  $\Lambda$ -**FL172**, PAK1 was cocrystallized with octahedral ruthenium complex.  $\Lambda$ -**FL172** was added to protein from 10 mM stock solution in DMSO to the final concentration of 1 mM and incubated on ice for 1 hour. Crystals were grown at 4 °C in 2 µl drops where 1 µl of protein/inhibitor solution was mixed with 1 µL of precipitate stock containing 0.1M Tris pH 8.0, 1M NaCl, 25% PEG 4000, 10 mM DTT. Cryoprotected crystals were flash frozen in liquid nitrogen and yielded X-ray diffraction to 1.65 Å at the APS 23ID-B beam line. For both structures, data were integrated and scaled using HKL2000 (Z. Otwinowski, W. Minor, *Methods Enzymol.* **1997**, 276, 307-326).



### C.3.) Structure determination and refinement

PAK1 inhibitor complex structures were solved by molecular replacement using the program Phaser (A. J. McCoy, R. W. Grosse-Kunstleve, L. C. Storoni, R. J. Read, *Acta Cryst.* **2005**, *D61*, 458-464) with the unliganded PAK1 (249-545, Lys299Arg) structure (PDB code 1YHW) as a search model (M. Lei, M.A. Robinson, S. C. Harrison, *Structure* **2005**, *13*, 769-778). Iterative cycles of refinement and manual rebuilding of the initial model were performed using the programs REFMAC5 (G. N. Murshudov, A. A. Vagin, E. J. Dodson, *Acta Crystallogr. Sect. D* **1997**, *53*, 240-255) and COOT (P. Emsley, K. Cowtan, *Acta Crystallogr. Sect. D: Biol. Crystallogr.* **2004**, *60*, 2126-2132), respectively. Inhibitor models were manually fitted into calculated  $F_o-F_c$  maps (Figure S13). The validity of each step of refinement and rebuilding was monitored by the  $R_{work}$  and  $R_{free}$ .

In both structures, after further refinement, both  $2F_o-F_c$  and  $F_o-F_c$  electron density maps showed clear and positive density for a phosphate group on Thr423 of the activation loop (Figure S14). Phosphorylation of Thr423 is known to stabilize the active conformation of the enzyme and the activation loop in both complexes adopts a conformation typical for the active kinase. The conformation of the activation loop is the same as in previously published structures: PAK1(K299R) and the PAK1 double mutant (K299R, T423E) (M. Lei, M.A. Robinson, S. C. Harrison, *Structure* **2005**, *13*, 769-778). The T423E mutation generates constitutively active enzyme when lysine is present at position 299, mimicking salt bridges between phosphothreonine and Arg388 and Arg421 that are present in our structures (Figure S14). The identical positions of the activation loop residues in our structures with previously published structures and the presence of phosphothreonine confirms that PAK1 in complex with both (*R*)-**DW12** and  $\Lambda$ -**FL172** adopts an active conformation. Data collection and refinement statistics for both complexes are shown in Table S8.

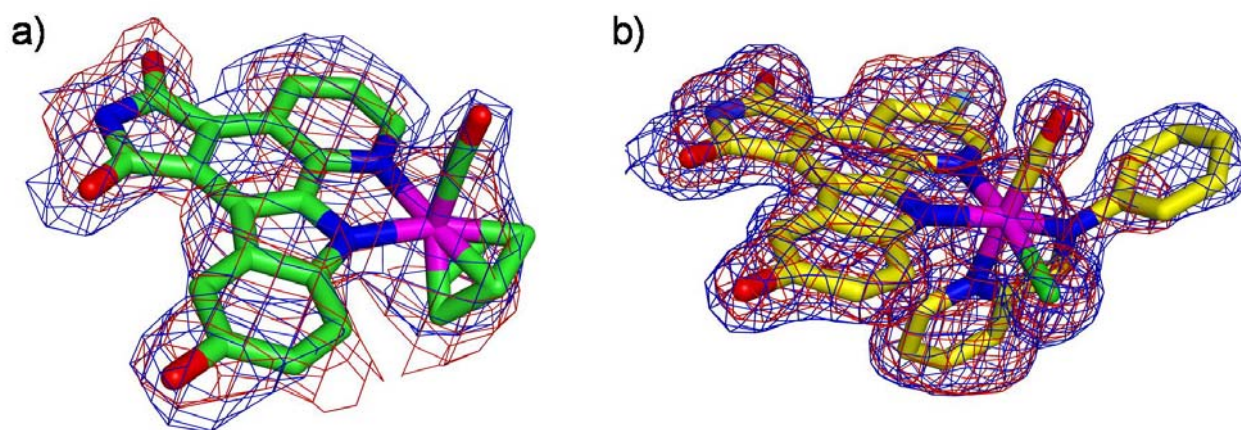

**Figure S13:** Electron density corresponding to (*R*)-**DW12** (a) and  $\Lambda$ -**FL172** (b). Fo-Fc electron density maps shown in red contoured at  $2.5\sigma$  calculated before building the inhibitor models, 2Fo-Fc electron density maps in blue, contoured at  $1\sigma$  after refining the structures with bound inhibitors.

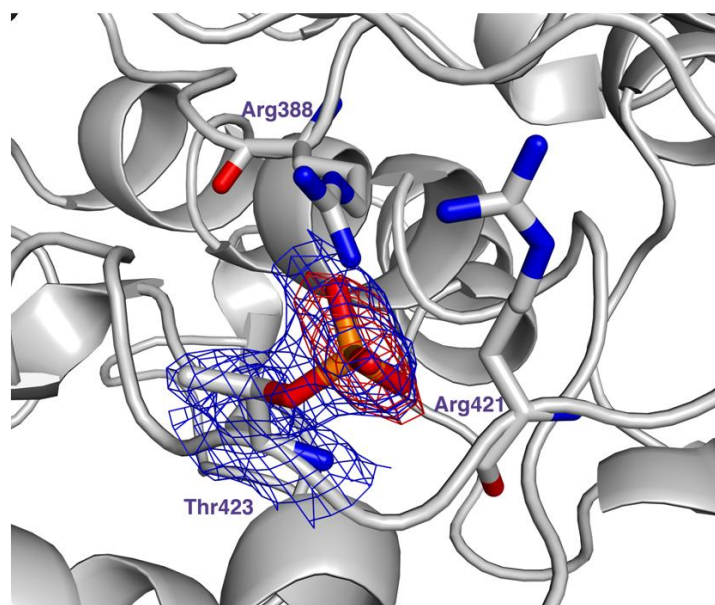

**Figure S14.** Phosphorylated Thr423, Arg388 and Arg421 shown only for PAK1- $\Lambda$ -**FL172** complex, since positions of corresponding residues in complex with (*R*)-**DW12** are virtually identical. In blue 2Fo-Fc electron density map for phospho-Thr contoured at  $1\sigma$ , in red Fo-Fc electron density contoured at  $2.5\sigma$  calculated before refinement with the phosphate group modeled.

**Table S8.** Data collection and refinement statistics.

| <i>Data collection</i>                                       |                                            |                                             |
|--------------------------------------------------------------|--------------------------------------------|---------------------------------------------|
| Complex                                                      | <b>PAK1-(R)-DW12</b>                       | <b>PAK1-A-FL172</b>                         |
| Space group                                                  | C222 <sub>1</sub>                          | C222 <sub>1</sub>                           |
| Cell dimensions [Å, °]                                       | a=53.050 b=102.66<br>c=122.341<br>α=β=γ=90 | a=52.183 b=103.475<br>c=122.653<br>α=β=γ=90 |
| Resolution [Å]                                               | 50.0- 2.35                                 | 30.0- 1.65                                  |
| Reflections<br>total, unique                                 | 78429, 14162                               | 267916, 40150                               |
| R <sub>merge</sub> <sup>a</sup>                              | 0.143 (0.402)                              | 0.077 (0.53)                                |
| I/σ                                                          | 11.3 (4.0)                                 | 22.5 (3.0)                                  |
| Completeness [%]                                             | 99.2 (100)                                 | 98.7 (94.1)                                 |
| Redundancy                                                   | 5.5 (5.6)                                  | 6.7 (5.9)                                   |
| <i>Refinement</i>                                            |                                            |                                             |
| R <sub>work</sub> /R <sub>free</sub> [%]                     | 20.2/ 26.0                                 | 19.5/ 21.8                                  |
| Ramachandran [%]<br>favoured / allowed /<br>disallowed       | 90.0/ 10.0/ 0                              | 91.9/ 8.1/ 0                                |
| R.m.s.d. <sup>b</sup><br>Bond lengths [Å]<br>Bond angles [°] | 0.012<br>1.321                             | 0.011<br>1.339                              |

<sup>a</sup> Data for highest resolution shell in parentheses<sup>b</sup>R.m.s.d = root-mean-square-deviation

## **D.) Cell-Based Assays**

**Cell culture conditions:** RT4 rat schwannoma cells were grown in low-glucose DME, 10% fetal calf serum, 1x non-essential amino acids and 100 IU/ml penicillin-streptomycin. For the treatment with racemic **FL172**, cells were first serum-starved overnight and then incubated for 1 hour with the compound at the final concentration ranging of 0.5 -20  $\mu$ M. DMSO was used as negative control.

**Kinase assay:** Following **FL172** treatment, RT4 cells were stimulated with 10 ng/ml PDGF for 5 minutes and then lysed in cell lysis buffer (40 mM HEPES, pH 7.4, 1% NP-40, 100 mM NaCl, 25 mM NaF, 1 mM EDTA, 1mM Na<sub>3</sub>VO<sub>4</sub> and 1x protease inhibitor cocktail). Protein concentration in cell extracts was determined using the Bradford assay and 500  $\mu$ g of the cell extracts were immunoprecipitated with Pak1 antibody-coupled beads (Santa Cruz). The beads were then washed 5 times with lysis buffer and twice with kinase buffer (40 mM HEPES, pH 7.4, 10 mM MgCl<sub>2</sub>). For the kinase reaction, 20  $\mu$ l of kinase reaction mix (4  $\mu$ g Histone H4, 20  $\mu$ M cold ATP, and 10 Ci [<sup>32</sup>P] $\gamma$ ATP in kinase buffer) was added to the beads and incubated at 30 °C for 10 min. The reaction was terminated by adding protein sample buffer and boiling for 5 min. The samples were then resolved by SDS-PAGE and exposed to film (Figure S15).

**Western blot:** The aliquots of the obtained cell extracts were resolved by SDS-PAGE and transferred to a PVDF membrane. Each sample contained the same amount of protein as determined by the Bradford assay. After the transfer, membranes were probed with the following antibodies: pRaf-1(S338) (Cell Signaling), pMEK(S298) (Millipore), pMEK(S217/221) (Cell Signaling), MEK (Cell Signaling), Pak1 (N-20, Santa Cruz),  $\alpha$ -tubulin (AC42, Sigma), according to manufacturer's instructions (Figure S15). Data for phospho-Raf-1(Ser338) and total Raf-1 (antibody from Cell Signaling) were generated probing the cell lysate obtained in the same way as described in an independent experiment (Figure S16).

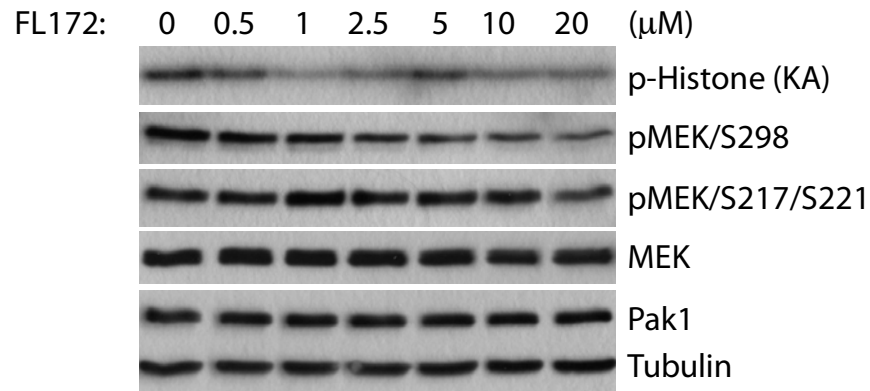

**Figure S15.** Serum-starved RT4 rat schwannoma cells were treated with racemic **FL172** at indicated concentrations for 1 hour and then stimulated with 10ng/ml PDGF for 5 minutes. Cell extracts were prepared from these cells and immunoprecipitated with PAK1 antibody-coupled beads. An *in vitro* kinase assay (KA) was carried out with the immunoprecipitates using Histone H4 as the substrate. Western blot analysis was also performed using aliquots of the extracts with various antibodies as indicated.

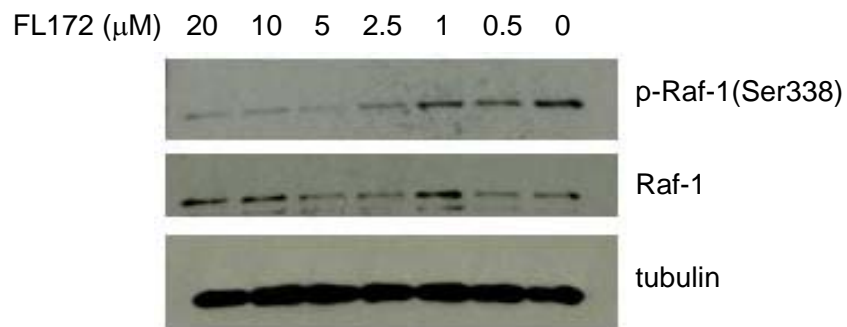

**Figure S16.** Serum-starved RT4 cells were treated with **FL172** at indicated concentrations for 1 hour and then stimulated with 10 ng/ml PDGF for 5 min. PAK1 inhibition was monitored by levels of Ser338-phosphorylated Raf-1 analyzed by Western blot with an anti-phospho-Raf-1(Ser338). Antibodies against endogenous levels of total Raf-1 and tubulin served as controls.
